## 1 **Asymmetric effects of acute stress on cost and benefit learning**

2 Stella Voulgaropoulou<sup>1\*</sup>, Fasya Fauzani<sup>1</sup>, Janine Pfirrmann<sup>1</sup>, Claudia Vingerhoets<sup>1,2</sup>, Thérèse  
3 van Amelsvoort<sup>1</sup>, Dennis Hernaus<sup>1</sup>

4

5 <sup>1</sup> Department of Psychiatry & Neuropsychology, Maastricht University, Minderbroedersberg  
6 4-6, 6211 LK Maastricht, The Netherlands

7 <sup>2</sup> Department of Radiology & Nuclear Medicine, Amsterdam University Medical Centre,  
8 Location AMC, Meibergdreef 5, 1105 AZ Amsterdam, The Netherlands.

9

### 10 **Abstract**

11 Stressful events trigger a complex physiological reaction – the *fight-or-flight* response – that  
12 can hamper flexible decision-making. Inspired by key neural and peripheral characteristics of  
13 the fight-or-flight response, here we ask whether acute stress changes how humans learn  
14 about costs and benefits. Participants were randomly exposed to an acute stress or no-stress  
15 control condition after which they completed a cost-benefit reinforcement learning task.  
16 Acute stress improved learning to maximize benefits (monetary rewards) relative to  
17 minimising energy expenditure (grip force). Using computational modelling, we demonstrate  
18 that costs and benefits can exert asymmetric effects on decisions when prediction errors that  
19 convey information about the reward value and cost of actions receive inappropriate  
20 importance; a process associated with distinct alterations in pupil size fluctuations. These  
21 results provide new insights into learning strategies under acute stress – which, depending on  
22 the context, may be maladaptive or beneficial - and candidate neuromodulatory mechanisms  
23 that could underlie such behaviour.

## 24 **Introduction**

25 Stress is ubiquitous in everyday life. From recurrent, brief, events (a work meeting, moving  
26 to a new house) to major life events (armed combat, pandemic, financial crisis), humans are  
27 continuously exposed to challenges in their daily environment. The immediate central and  
28 peripheral physiological cascade triggered by such events, collectively termed the *fight-or-*  
29 *flight (or acute stress) response* (Cannon, 1915), serves an allostatic role that enables  
30 organisms to adequately respond to environmental demands (de Kloet, Joëls, & Holsboer,  
31 2005). Although beneficial for survival, this allostatic process comes at a cost: stress-induced  
32 redistributions of neural resources - e.g., towards vigilance or threat detection - may hamper  
33 the deployment of strategies that support adaptive and optimal decision-making (Hermans,  
34 Henckens, Joëls, & Fernández, 2014).

35 Optimal decisions essentially depend on the ability to rapidly learn from the positive  
36 and negative outcomes of previous actions, also known as *reinforcement learning* (Niv,  
37 2009). Considerable evidence now suggests that acute stress impairs aspects of reinforcement  
38 learning (Carvalho, Conceição, Mesquita, & Seara-Cardoso, 2020; de Berker et al., 2016;  
39 Raio, Hartley, Oederu, Li, & Phelps, 2017). Acute stress, among others, modulates the  
40 impact of positive outcomes on future decisions - both positively and negatively - (Berghorst,  
41 Bogdan, Frank, & Pizzagalli, 2013; Carvalho et al., 2020; Lighthall, Gorlick, Schoeke,  
42 Frank, & Mather, 2013; Petzold, Plessow, Goschke, & Kirschbaum, 2010), likely driven by  
43 changes in reward sensitivity and the signalling of reward prediction errors (RPEs)  
44 (Berghorst et al., 2013; Carvalho et al., 2020; Huys, Pizzagalli, Bogdan, & Dayan, 2013);  
45 putatively dopaminergic teaching signals that represent the mismatch between actual and  
46 expected outcomes, which are used to flexibly adjust behaviour (Niv, 2009; Rescorla, 1972).  
47 Alterations in the influence of RPEs on future decisions play a key role in the development of

48 motivational impairments, which are frequently observed in behavioural disorders associated  
49 with repeated and/or prolonged stress exposure (Huys et al., 2013).

50 Intuitive as it is, the notion that the impact of acute stress on (potentially maladaptive)  
51 decisions *primarily* involves changes in how reward value influences action may be  
52 oversimplified. Decisions are not only motivated by appetitive properties; they equally  
53 depend on the – cognitive (e.g., mental effort) or physical (e.g., energy) – *cost* associated  
54 with actions (Hauser, Eldar, & Dolan, 2017; Pessiglione, Vinckier, Bouret, Daunizeau, & Le  
55 Bouc, 2017; Schmidt, Lebreton, Cléry-Melin, Daunizeau, & Pessiglione, 2012). Expectations  
56 about action costs are also updated according to a prediction error rule (Skvortsova, Degos,  
57 Welter, Vidailhet, & Pessiglione, 2017; Skvortsova, Palminteri, & Pessiglione, 2014)  
58 (henceforth “effort” prediction errors; EPEs), which due to the aversive and resource-  
59 consuming nature of effort, optimal learners should utilize to minimize effort expenditure.  
60 When decisions involve a potential cost *and* benefit, the former is subtracted from the latter  
61 to compute a “net” or subjective decision value (i.e., effort-discounted reward value) (Klein-  
62 Flügge, Kennerley, Friston, & Bestmann, 2016; Skvortsova et al., 2017; Skvortsova et al.,  
63 2014). Notably, stress exposure impairs cost-benefit decisions in rodents when learning is not  
64 explicitly required (Friedman et al., 2017; Shafiei, Gray, Viau, & Floresco, 2012). Moreover,  
65 in a reinforcement learning context, acute stress blocks the flexible updating of aversive  
66 value (Raio et al., 2017), an inherent property of costly actions. These results suggest that  
67 decisions during acute stress may involve a complex shift in reinforcement learning strategies  
68 that serve to balance the cost versus benefits of decisions; a hypothesis that hitherto has  
69 remained unexplored.

70 Although computationally similar in nature, distinct neural correlates of RPEs (e.g.,  
71 striatal subdivisions, ventromedial prefrontal cortex [vmPFC]) and EPEs (e.g., parietal  
72 cortex, insula, dorsomedial PFC) can be observed in cost-benefit reinforcement learning

73 paradigms (Hauser et al., 2017; Skvortsova et al., 2014). The ascending dopaminergic (e.g.,  
74 RPEs, action cost, reward value) (Schultz, Dayan, & Montague, 1997; Skvortsova et al.,  
75 2017; Yohn et al., 2016), noradrenergic (e.g., mobilizing energy) (Pessiglione et al., 2017;  
76 Varazzani, San-Galli, Gilardeau, & Bouret, 2015) and serotonergic (e.g., aversive value,  
77 overcoming action costs) (H. E. den Ouden et al., 2015; Meyniel et al., 2016)  
78 neuromodulatory systems, moreover, encode partly dissociable aspects of goal-directed  
79 actions that involve learning about costs and benefits, which together support optimal  
80 decision-making. These observations are noteworthy because the initial fight-or-flight  
81 response triggers a large-scale reorganization of brain networks that is driven by alterations in  
82 the firing mode of midbrain dopaminergic ventral tegmental area and noradrenergic *locus*  
83 *coeruleus* neurons (Arnsten, 2015; Hermans et al., 2014); neurons that signal prediction  
84 errors (Steinberg et al., 2013) and that are also responsive to reward value, action cost and  
85 energy expenditure (Del Arco, Park, & Moghaddam, 2020; Varazzani et al., 2015). Thus,  
86 catecholaminergic mechanisms that are recruited by the fight-or-flight response may  
87 differentially impact cost and benefit reinforcement learning, resulting in a potential scenario  
88 in which costs and benefits exert asymmetric influences on decisions.

89         As mentioned above, the central (i.e., neural) effects of acute stress trigger a shift in  
90 cognitive strategies, including reinforcement learning. The peripheral counterpart of the acute  
91 stress response, however, mobilizes the energy (i.e., adrenaline-mediated glucose release (de  
92 Kloet et al., 2005; Russell & Lightman, 2019)) that is required to exert effortful actions  
93 aimed at preserving homeostasis (Cannon, 1915). Therefore, decision-making and learning  
94 policies regarding physical costs may be *especially* susceptible to stress: both via  
95 computational (neural) mechanisms that support learning about and representation of action  
96 cost, as well as peripheral mechanisms that co-determine the amount of available energy that  
97 can be directed towards effortful actions. Indeed, preliminary evidence suggests that acute

98 stress alters the willingness to exert physical effort for rewards (Bryce & Floresco, 2016) and  
99 reward-associated cues in a Pavlovian-instrumental transfer context (Pool, Brosch,  
100 Delplanque, & Sander, 2015).

101         How acute stress impacts reinforcement learning involving costs *and* benefits has not  
102 been investigated to date in humans. Based on the above considerations, we expect that  
103 computationally frugal learning strategies, in concert with increased energy availability,  
104 during acute stress should asymmetrically impact cost versus benefit learning. Using an acute  
105 stress-induction paradigm, a cost-benefit learning paradigm and computational model of cost-  
106 benefit reinforcement learning (Skvortsova et al., 2017; Skvortsova et al., 2014), we  
107 demonstrate that acute stress asymmetrically prioritizes reward (maximization) learning over  
108 physical effort (minimization) learning. Better benefit versus cost learning results from a  
109 stress-induced change in the influence of RPEs versus EPEs on future decisions, and is  
110 associated with altered pupil encoding of RPEs, EPEs, and subjective decision value. These  
111 results reveal how neural and peripheral mechanisms that support the fight-or-flight response  
112 may facilitate a shift in reinforcement learning strategies that confers strategic benefits during  
113 acutely stressful situations (e.g., ignoring high action costs to achieve a desirable outcome),  
114 yet might also give rise to maladaptive behaviour (e.g., stress-induced relapse in substance  
115 users).

116 **Results**

117 **Experiment design**

118 Healthy human participants were randomly assigned to the acute stress (19 males/21 females;  
119 age  $M=23.48$ ,  $SD=3.94$ ) or no-stress control condition (18 males/22 females; age  $M=23.80$ ,  
120  $SD=4.23$ ) of the Maastricht Acute Stress Task (MAST) (Smeets et al., 2012), a validated  
121 psychological and physical stress-induction paradigm (see Materials and Methods).  
122 Immediately post-MAST and within the confines of the acute stress response (Hermans et al.,  
123 2014), all participants completed a ~40 minute probabilistic cost-benefit reinforcement  
124 learning paradigm, adapted from Skvortsova et al. (Skvortsova et al., 2017; Skvortsova et al.,  
125 2014), in which they learned to select stimuli with high reward value (20 Eurocents) and  
126 avoid stimuli with high action cost (exerting grip force above a pre-calibrated individual  
127 threshold of 50% maximum voluntary contraction for 3000ms), followed by a surprise test  
128 phase. A detailed overview of the paradigm is provided in Figure 1 and the Materials and  
129 Methods. Pupil size was continuously recorded while participants performed the task (see  
130 Materials and Methods).

131 **Figure 1**

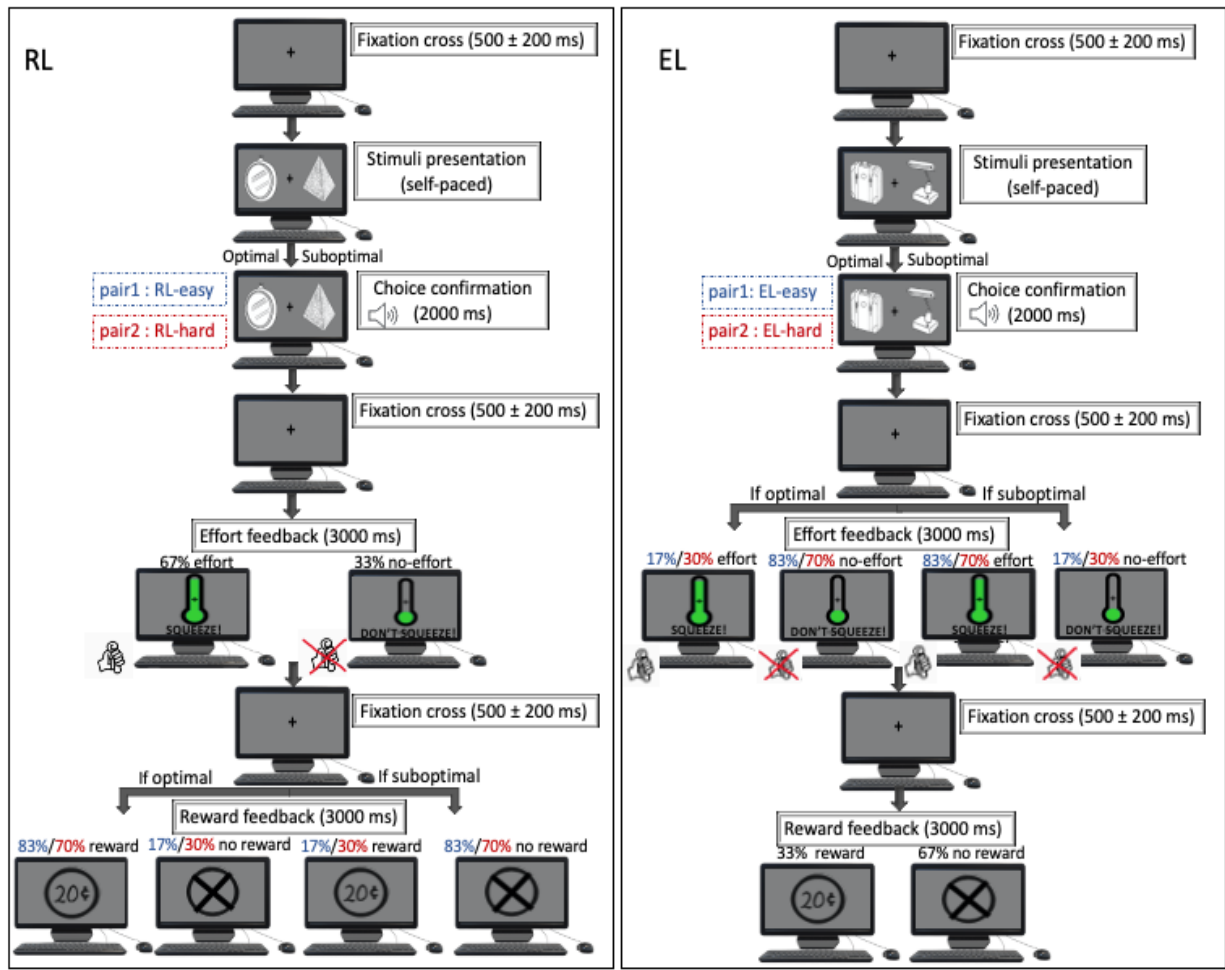

132

133 **Reward maximisation/action cost minimization reinforcement learning task.**

134 Visual depiction of the learning phase. Participants were presented with four distinct stimulus  
135 pairs, and all stimuli were associated with a predetermined chance of a €0.20 monetary  
136 reward (versus no reward) and a chance of having to exert physical effort (grip force) using a  
137 dynamometer (versus no grip force required). Stimulus-outcome probabilities were yoked in  
138 such a way that, for a given pair, two stimuli *only* differed in the probability of earning a  
139 reward (“reward learning”, RL, left) or the probability of having to exert effort (“effort  
140 learning”, EL, right). That is, for RL (left)/EL (right) pairs, reward/effort outcomes were  
141 choice-dependent, respectively (see “Reward feedback” for RL and “Effort feedback” for EL  
142 for outcome contingencies). For RL pairs, effort outcomes were independent of choice and  
143 fixed (see “Effort feedback” for RL), while for EL pairs, reward outcomes were independent

144 of choice and fixed (see “Reward feedback” for EL). Percentages in blue and red refer to  
145 outcomes for the Easy RL/EL and Hard RL/EL pair, respectively.

146

### 147 **Acute stress manipulation**

148 We first ascertained whether the acute stress manipulation was successful. Subjective stress,  
149 physiological and neuroendocrine measurements are displayed in Figure 2. Acute stress and  
150 no-stress control groups did *not* differ on physiological, subjective stress, or neuroendocrine  
151 measurements pre-MAST (all *p-values*>0.05). We observed significant Condition-by-Time  
152 interactions for subjective stress ratings [PANAS negative:  $F(1,78)=52.66$ ,  $p<0.001$ ,  
153  $n^2_G=0.10$ ; PANAS positive:  $F(1,78)=9.82$ ,  $p=0.002$ ,  $n^2_G=0.02$ ] and physiological measures  
154 [systolic blood pressure (SBP):  $F(1,78)=15.50$ ,  $p<0.001$ ,  $n^2_G=0.04$ ; heart rate:  $F(1,78)=6.83$ ,  
155  $p=0.011$ ,  $n^2_G=0.02$ ]. Simple main effect analyses revealed that only the acute stress group  
156 exhibited pre-to-post *increases* in negative affect [control pre-post:  $t(39)=4.21$ ,  $p<0.001$ ;  
157 stress pre-post:  $t(39)=-6.17$ ,  $p<0.001$ ; control-stress post-MAST:  $t(55.1)=-5.78$ ,  $p<0.001$ ],  
158 and greater pre-to-post *decreases* in positive affect [control pre-post:  $t(39)=4.09$ ,  $p<0.001$ ;  
159 stress pre-post:  $t(39)=6.45$ ,  $p<0.001$ ; control-stress post-MAST:  $t(72.8)=2.53$ ,  $p=0.014$ ]  
160 (Figure 2). Similarly, only the acute stress group exhibited stress-induced *increases* in SBP  
161 [control pre-post:  $t(39)=1.60$ ,  $p<0.117$ ; stress pre-post:  $t(39)=-3.66$ ,  $p<0.001$ ; control-stress  
162 post-MAST:  $t(69.1)=-3.27$ ,  $p=0.002$ ] and heart rate [control pre-post:  $t(39)=1.21$ ,  $p=0.234$ ;  
163 stress pre-post:  $t(39)=-2.78$ ,  $p=0.008$ ; control-stress post-MAST:  $t(76.9)=-3.14$ ,  $p=0.002$ ]  
164 (Figure 2a-d).

165 An expected Condition-by-Time interaction was found for salivary cortisol (sCORT)  
166 responses [ $F(5,390)=18.05$ ,  $p<0.001$ ,  $n^2_G=0.04$ ], with the acute stress group displaying  
167 greater sCORT levels 10 min post-MAST and onwards (all *p-values*<0.01). We additionally  
168 observed a main effect of Condition on sCORT area-under-the-curve with respect to increase:



169 (AUCi) (Pruessner, Kirschbaum, Meinlschmid, & Hellhammer, 2003) ( $t(56.32)=-5.28$ ,  
 170  $p<0.001$ ) and salivary alpha-amylase (sAA) AUCi ( $t(67.45)=-2.50$ ,  $p=0.015$ ; after excluding  
 171 one extreme outlier from the control group), suggesting greater sCORT and sAA levels in  
 172 response to acute stress (Figure 2e-g). These results confirm that the MAST robustly induced  
 173 stress on all levels of inquiry.

174

175 **Figure 2**

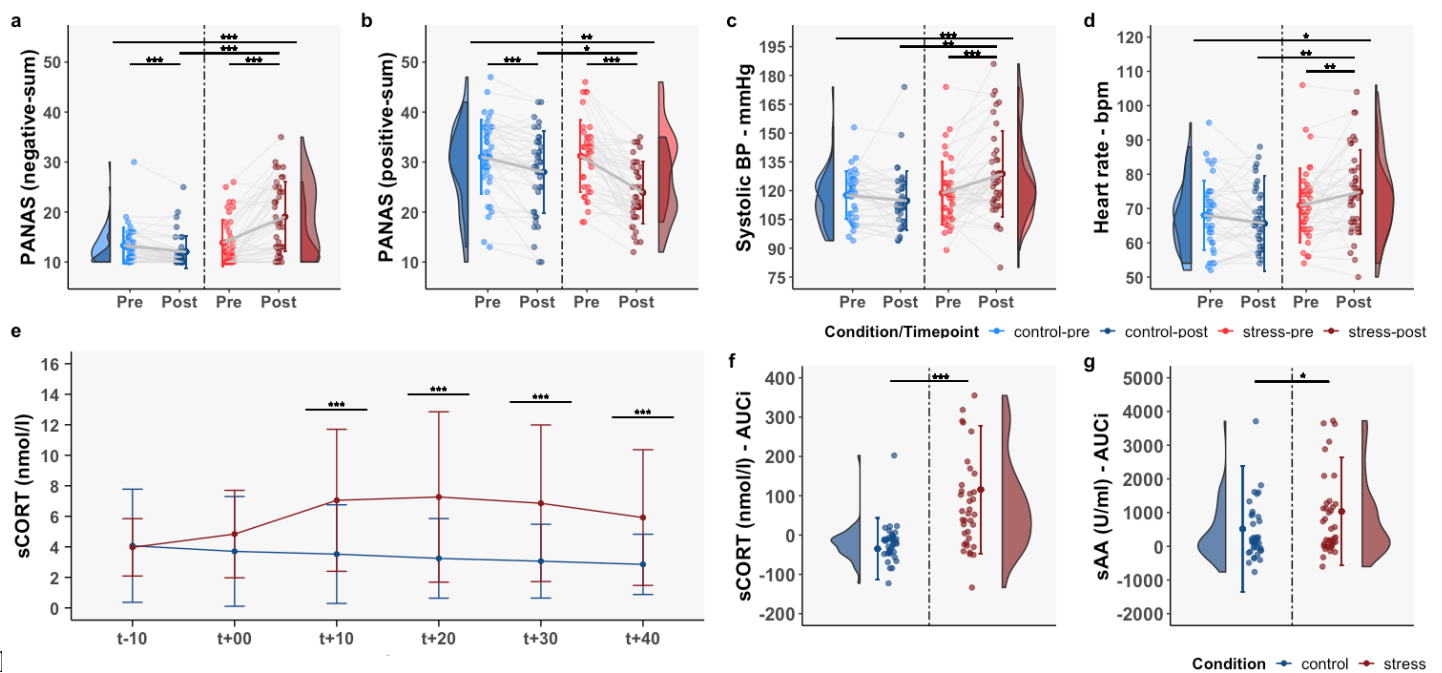

177 **Neuroendocrine, physiological and subjective stress ratings.**

178 PANAS negative (a) and positive (b) subscale sum scores, systolic blood pressure (mmHg:  
 179 millimetres of mercury; c) and heart rate (bpm: beats per minute; d) are displayed for no-  
 180 stress control (blue) and acute stress (red) groups separately for pre (light blue/red) and post  
 181 (dark blue/red) MAST time points. SCORT responses for both conditions across the 6  
 182 timepoints are displayed in panel e (“t+00” represents the first post-MAST measurement, and  
 183 the start of the reward maximization/action cost reinforcement learning paradigm; “t-10”  
 184 represent a baseline sample). Panel f and g show AUCi for sCORT (nmol/l: nanomoles per  
 185 litre) and sAA (U/mL: Units per millilitre) responses for both MAST conditions. Significant

186 differences are denoted by asterisks (\*:  $p < 0.05$ , \*\*:  $p < 0.01$ , \*\*\*:  $p < 0.001$ ). In the upper  
187 panel, the top line denotes a significant Condition-by-Time interaction; lower lines represent  
188 simple main effects of Condition or Time.

189

## 190 **Participants use reinforcement learning to optimize decisions**

191 Next, we investigated whether participants in both conditions exhibited evidence of  
192 reinforcement learning to optimize actions, which in this paradigm should be reflected by an  
193 increased tendency to select stimuli with high reward value and avoid stimuli with high  
194 action cost as a function of increasing number of stimulus pair presentations (i.e., “time”).  
195 This intuition was confirmed by a main effect of Time on two distinct trial types: trials on  
196 which participants could learn to accumulate frequent rewards while the probability of effort  
197 (action cost) was kept constant (RL; selecting the stimulus more frequently associated with  
198 €0.20) [control:  $F(2,78)=10.16$ ,  $p<0.001$ ,  $n^2_G=0.06$ ; stress:  $F(2,78)=20.44$ ,  $p<0.001$ ,  $n^2_G=$   
199  $0.17$ ] and trials on which participants could learn to frequently avoid effort while the  
200 probability of reward was kept constant (EL; selecting the stimulus more frequently  
201 associated with avoidance of physical energy expenditure) [control:  $F(2,78)=12.35$ ,  $p<0.001$ ,  
202  $n^2_G=0.07$ ; stress:  $F(2,78)=9.76$ ,  $p<0.001$ ,  $n^2_G=0.05$ ]. We additionally observed greater than  
203 chance-level performance ( $\geq 0.5$ ) on both trial types during the final part of the task  
204 (presentation 21-30; all  $p$ -values  $< 0.001$  Figure Supplement 1).

205

## 206 **Asymmetric cost-benefit reinforcement learning during acute stress**

207 After having observed evidence for reward (maximization) learning and action cost  
208 (minimization) learning, we tested our key assumption; that acute stress would induce a  
209 reprioritization in learning to maximize reward value versus learning to minimize action cost.  
210 Crucially, we observed a significant Condition-by-Trial Type interaction [ $F(1,78)=6.53$ ,

211  $p=0.013$ ,  $n^2_G= 0.039$ ] (Figure 3a) with pairwise comparisons indicating that the acute stress  
212 group performed significantly better on RL than EL trials [ $t(39)=5.40$ ,  $p<0.001$ ], while the  
213 no-stress control group performed similarly on both trial types [ $t(39)=1.01$ ,  $p=0.320$ ]. A main  
214 effect of Condition on RL-EL accuracy difference scores [ $t(74.02)=-2.55$ ,  $p=0.013$ ] (Figure  
215 3b) and one-sample t-tests revealed that RL-EL accuracy difference scores were significantly  
216 greater than zero in the acute stress group but not in the no-stress controls. Simple main  
217 effects of Condition on RL [ $t(65.9)=-1.75$ ,  $p=0.085$ ] and EL [ $t(77.5)=1.80$ ,  $p=0.076$ ]  
218 performance showed numerical trends for group differences that failed to reach significance.

219         When we included participants that still performed at chance level at the end of the  
220 learning phase (see Participants) in the Condition-by-Trial Type interaction analysis, the  
221 interaction remained significant [ $F(1,91)=7.30$ ,  $p=0.035$ ,  $n^2_G= 0.04$ ], with the acute stress  
222 group displaying better RL vs. EL performance ( $t(46)=5.83$ ,  $p<0.001$ ), while no-stress  
223 controls performed similarly on both trial types ( $t(45)=1.24$ ,  $p=0.22$ ). Participants in the acute  
224 stress group outperformed participants in the no-stress control group on RL ( $t(91)=2.04$ ,  
225  $p=0.04$ ), but no simple main effect of Condition was observed for EL ( $t(91)=-1.67$ ,  $p=0.1$ ).  
226 These participants were excluded for all other analyses reported below.

227         The use of different reinforcement probabilities for each RL and EL pair (Figure 1)  
228 allowed us to discern whether the observed pattern of results reflected a *specific* change in  
229 cost (EL) versus benefit (RL) reinforcement learning, or a more general impairment in  
230 reinforcement learning for more difficult stimulus-response associations. We found no  
231 evidence for the latter scenario in Condition-by-Trial Type-by-Difficulty [ $F(1,78)=1.05$ ,  
232  $p=0.310$ ] or Condition-by-Difficulty [ $F(1,78)=0.36$ ,  $p=0.549$ ; Figure Supplement 2]  
233 interaction analyses.

234         When we investigated the use of win-stay (resampling a stimulus following a positive  
235 outcome) and lose-shift (switching to the other stimulus following a negative outcome)

236 strategies (Hanneke E. M. den Ouden et al., 2013), we observed no significant Condition-by-  
237 Strategy interaction [ $F(1,78)=2.99, p=0.087, \eta^2_G=0.03$ ]. However, *post hoc* comparisons  
238 revealed that participants in the acute stress condition [ $t(39)=-3.73, p<0.001$ ] but not those in  
239 the no-stress control condition [ $t(39)=-1.30, p=0.200$ ], exhibited different win-stay compared  
240 to lose-shift (difference) rates. Separate Condition (main effect) analyses indicated that acute  
241 stress participants compared to no-stress controls were more likely to win-stay for rewards  
242 (RL trials) than for avoidance of action cost (EL trials) [ $t(78)=-2.28, p=0.025$ ], but not for  
243 lose-shifting for reward omissions (RL trials) compared to exerting effort (EL trials)  
244 [ $t(77.7)=-0.23, p=0.820$ ]. Differences in win-stay rates for RL compared to EL trials (one-  
245 sample t-test) were greater than zero for the acute stress [ $t(39)=4.91, p<0.001$ ] but not the no-  
246 stress control group [ $t(39)=1.68, p=0.101$ ] (Figure 3c).

247         Taken together, our model-free results indicate that acute stress leads to a  
248 reinforcement learning strategy that favours learning to maximise reward value over  
249 minimisation of action cost, which based on analyses of win-stay/lose-shift rates, could be  
250 attributed to increased sensitivity to positive reinforcement (i.e., reward delivery) compared  
251 to negative reinforcement (i.e., avoidance of physical effort).

252 **Figure 3**

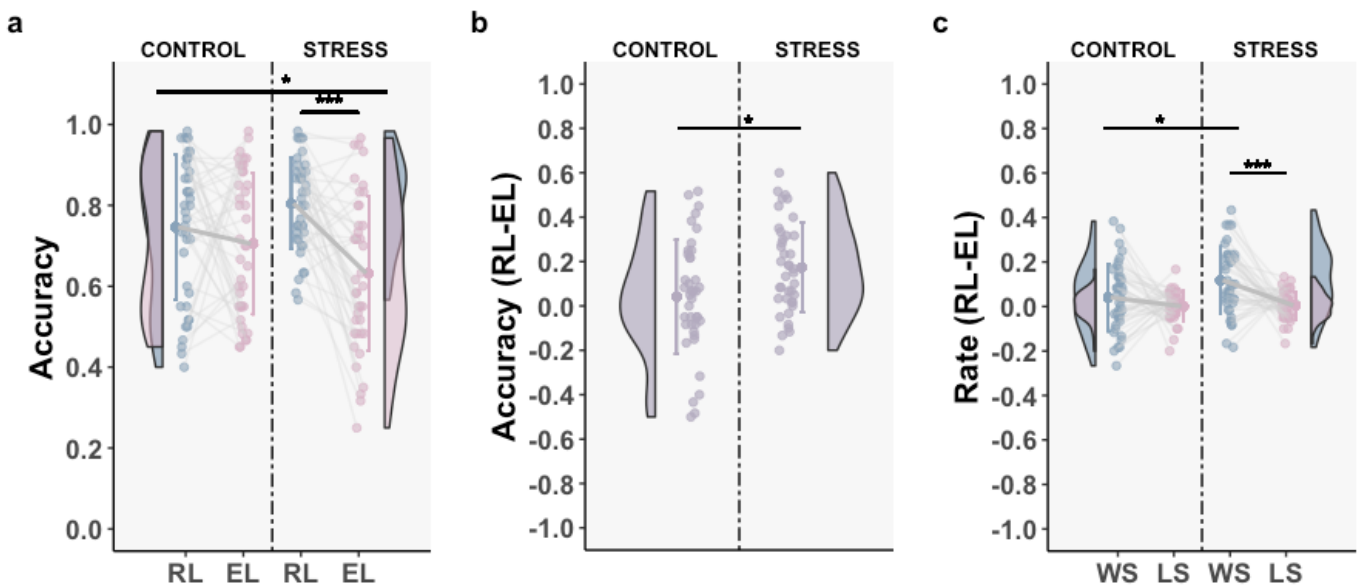

25

254 **Acute stress leads to improved benefit versus cost learning.**

255 Panel a: Average accuracy (choices of the optimal stimulus) for RL and EL trials, for each

256 condition separately. Panel b: RL-EL average accuracy difference scores. Panel c:

257 Win-stay ( $WS_{RL}-WS_{EL}$ ) and lose-shift ( $LS_{RL}-LS_{EL}$ ) difference scores for each condition

258 separately. Means  $\pm$  SD, individual data points, distribution and frequency of the data are

259 displayed. In panel a, the top line indicates a significant Condition-by-Trial type interaction.

260 Significant differences are denoted by asterisks (\*:  $p < 0.05$ , \*\*:  $p < 0.01$ , \*\*\*:  $p < 0.001$ ).

261 Source files of task performance data used for the analyses are available in the Figure 3 –

262 Source Data 1.

263

264 **Asymmetric cost-benefit reinforcement learning biases actions in acute stress subjects**

265 During a surprise 64-trial test phase (D. HERNÁUS, Gold, Waltz, & Frank, 2018), we asked

266 participants to discriminate original and novel combinations of stimuli on the basis of reward

267 value or action cost without receiving feedback ( $n=16$  trials for original combinations;  $n=48$

268 for novel combinations; see Materials and Methods). The surprise test phase allowed us to

269 assess learned choice tendencies without having to arbitrarily choose a given number of final  
270 learning phase trials, during which participants may still learn. This approach also allowed us  
271 to assess the degree to which learned tendencies would carry over to novel contexts.

272 First, both groups chose the optimal (most rewarding/effort avoiding) stimulus on  
273 surprise test phase trials involving the original four pairs [one-sample t-test against chance;  
274 control<sub>RL</sub>:  $t(39)=8.73$ ,  $p<0.001$ ; control<sub>EL</sub>:  $t(39)=3.72$ ,  $p=0.002$ ; stress<sub>RL</sub>:  $t(39)=13.54$ ,  
275  $p<0.001$ ; stress<sub>EL</sub>:  $t(39)=4.47$ ,  $p<0.001$ ], confirming that both groups had developed a  
276 preference for the optimal stimulus.

277 Although we observed no Condition-by-Trial type (reward value, action cost  
278 discrimination) interaction or main effects of Condition for novel stimulus combinations  
279 [ $F(1,78)=1.10$ ,  $p=0.298$ ,  $\eta^2_G=0.01$ ; stress vs. controls reward value discrimination:  $t(75.9)=$   
280  $0.15$ ,  $p=0.878$ ; stress vs. controls action cost discrimination:  $t(78)=1.77$ ,  $p=0.080$ ], pairwise  
281 comparisons revealed that the acute stress group performed better on reward discrimination  
282 compared to action cost discrimination trials [ $t(39)=-2.23$ ,  $p=0.032$ ], while no-stress controls  
283 performed similarly on both trial types [ $t(39)=-0.87$ ,  $p=0.387$ ]. These results provide some  
284 evidence that a reward maximisation-over-action cost minimisation reinforcement learning  
285 policy might bias future actions in novel contexts (Figure Supplement 3).

286

## 287 **Computational cost-benefit reinforcement learning model: Model Fitting, Selection,** 288 **Demonstrations, and Simulations**

289 To uncover latent mechanisms by which acute stress affects cost-benefit reinforcement  
290 learning, we turned to computational cognitive modelling. Trial-by-trial choices of  
291 participants were fit to all candidate models described in the Materials and Methods (see  
292 Model Space). To calculate model fit, log likelihood was updated trial-wise by the log of the  
293 probability of the observed choice, calculated via a softmax rule (see Materials and Methods,

294 equation 6), and best-fitting parameters were identified using `fmincon` in MATLAB v.2019B  
295 (Mathworks, Natick, MA, USA).

296 Bayesian Model Selection (BMS; `spm_BMS` function in SPM12,  
297 <http://www.fil.ion.ucl.ac.uk/spm/software/spm12/>) using the Akaike Information Criterion  
298 (AIC) as a fit statistic that penalizes for the number of model parameters (Myung, Tang, &  
299 Pitt, 2009), suggested that the 2LR\_ $\gamma$  model was the most likely model, as indicated by the  
300 protected exceedance probability ( $\text{pxp}$ ,  $\phi = 0.99$ ) (Rigoux, Stephan, Friston, & Daunizeau,  
301 2014) and expectation of the posterior [ $p(r|y)$ , 0.70] (Figure 4a for  $p(r|y)$  of all candidate  
302 models). We note that 2LR\_ $\gamma$  remained the most likely model when we considered additional  
303 models with greater redundancy and/or lesser biological plausibility (e.g., models with all  
304 combinations of reward value/action cost discounting *and* weight parameters).

305 The 2LR\_ $\gamma$  model contains separate learning rates that weight the importance of RPEs  
306 and EPEs ( $\alpha_R$ ,  $\alpha_E$ ), an action cost discounting parameter ( $\gamma$ ), and an inverse temperature  
307 parameter ( $\beta$ ), which in previous work could account for performance on a conceptually  
308 similar cost-benefit learning task (Skvortsova et al., 2014). To demonstrate the effect of  
309 changes in parameters values on choice preferences within the 2LR\_ $\gamma$  architecture, we first  
310 simulated choices from 50 artificial agents (averaged across 10 repetitions) performing the  
311 reward maximization/action cost minimization reinforcement learning task using a range of  
312 parameter values. As expected, greater values of  $\alpha_R$  and  $\alpha_E$  primarily impacted the speed of  
313 RL and EL choice preferences, while low values of  $\gamma$  lead to asymmetric choice preferences  
314 through discounting of action cost, and lower values of  $\beta$  lead to non-selective increases in  
315 random sampling (Figure 4b).

316 In *post hoc* simulations, i.e., generating participant choices using the obtained  
317 parameters, we additionally observed moderate-to-high correlations between simulated and  
318 empirical RL/EL for the acute stress and no-stress control group [ $\rho_{\text{RL\_control}} = 0.55$ ,  $p < 0.01$ ;

319  $\rho_{RL\_stress} = 0.84, p < 0.01; \rho_{EL\_control} = 0.56, p < 0.01; \rho_{EL\_stress} = 0.77, p < 0.01$ ; see Figure  
320 Supplement 4], although the canonical performance difference in RL versus EL accuracy was  
321 not selective to the acute stress group [ $t_{control}(39)=-6.72, p<0.001; t_{stress}(39)=-6.01, p<0.001$ ].  
322 However, after we fixed  $\beta$  and  $\gamma$  to group-level averages, to better demonstrate the effect of  
323 group differences in the learning rate parameters, we recovered a small but significant  
324 simulated difference in RL versus EL performance for the acute stress group [ $t(39)=2.27,$   
325  $p=0.029$ ], which was not predicted in the no-stress control group [ $t(39)=0.91, p=0.367$ ]  
326 (Condition-by-Trial Type interaction: [ $F(1,78)= 0.77, p=0.38, n^2_G= 0.006$ ]) (Figure 4c for  
327 empirical versus simulated data, averaged across 100 repetitions per subject).

328       Importantly, even if a given model is the most likely one based on model fitting and  
329 *post hoc* simulation results from the entire sample, there is still the possibility that different  
330 models can better explain task performance in the no-stress control and acute stress  
331 condition. When repeating BMS for each condition separately, 2LR\_ $\gamma$  was the most likely  
332 model in the no-stress control group [ $\phi=0.99, p(r|y)=0.83$ ], while for acute stress subjects  
333 2LR\_ $\gamma$  was not convincingly the most likely model [ $\phi=0.47, p(r|y)=0.46$ ]. Here, the 2LR  
334 model (containing  $\alpha_R, \alpha_E,$  and  $\beta$  parameters) was equally likely to be the optimal model  
335 [ $\phi=0.53, p(r|y)=0.47$ ]. Post-hoc simulations from the 2LR model also correlated with actual  
336 data, both for no-stress control [ $\rho_{RL} = 0.65, p < 0.001; \rho_{EL} = 0.60, p < 0.001$ ] and acute stress  
337 participants [ $\rho_{RL} = 0.81, p < 0.001; \rho_{EL} = 0.75, p < 0.001$ ].

338       Similar to the 2LR\_ $\gamma$  model (results discussed in next section), the 2LR model  
339 seemingly also explained stress-induced changes in cost-benefit reinforcement learning via  
340 changes in learning rates; in the 2LR model, the acute stress group exhibited greater values of  
341  $\alpha_R$  versus  $\alpha_E$  ( $t(39)=2.65, p=0.01$ ), while no-stress control subjects did not ( $t(39)=0.69,$   
342  $p=0.50$ ) (Condition-by-Learning Rate interaction: [ $F(1,78)=2.88, p=0.094, n^2_G= 0.01$ ]). The  
343 difference in learning rates between 2LR\_ $\gamma$  (where  $\alpha_R$  and  $\alpha_E$  are similar for the acute stress



344 group, see next section) and 2LR (where  $\alpha_R > \alpha_E$  for the acute stress group) can be explained  
345 by the absence of discounting parameter  $\gamma$ : 2LR is a special case of 2LR\_ $\gamma$ , where  $\gamma=1$ , and  
346 thus asymmetric effects of acute stress on reward value maximization and action cost  
347 minimization can only be explained by *dissimilarity* in learning rates.

348         Although the effects of acute stress on reward value and action cost learning rates are  
349 opposite in 2LR\_ $\gamma$  versus 2LR architectures, these results bolster our confidence in the  
350 overall model space, as well as the interpretation that acute stress primarily impacts reward  
351 value and action cost learning rates, and *not* discounting. The observations that I) 2LR\_ $\gamma$  fit  
352 better in the entire group of participants, II) 2LR is fully contained within the 2LR\_ $\gamma$  model,  
353 and III) 2LR\_ $\gamma$  displayed good recoverability (see *below*) motivated our choice to focus on  
354 the 2LR\_ $\gamma$  model.

355         In model recoverability analyses i.e., re-fitting the simulated data from the model to  
356 all candidate models (Wilson & Collins, 2019), BMS confirmed that the simulated 2LR\_ $\gamma$   
357 data (that is, simulations *without* fixed parameters) were most likely to be generated from  
358 2LR\_ $\gamma$  [ $\phi=0.99$ ,  $p(r|y)=0.71$ ].

359         To assess the stability of 2LR\_ $\gamma$  parameters, we repeated model fitting using a  
360 Bayesian hierarchical model fitting approach consisting of two steps, as described previously  
361 (Daw, 2011; Frey, Frank, & McCabe, 2019). In the first step we fit the 2LR\_ $\gamma$  model to trial-  
362 wise choices to obtain subject-specific parameters; in a second step we again fit the model to  
363 trial-wise choices, but this time we used the group-level average and covariance matrix of  
364 every parameter as priors, thereby shrinking the parameter search space. Motivated by recent  
365 work showing that group-specific priors, compared to a single prior for the entire sample, can  
366 better account for between-group differences in task performance, as well as improve  
367 parameter robustness and recoverability (Valton, Wise, & Robinson, 2020), we used separate  
368 mean and covariance matrices for the acute stress and no-stress control groups.

369            Highly similar parameter estimates were obtained after hierarchical fitting (for  
370 parameter estimates after Bayesian hierarchical model fitting see Figure Supplement 5).  
371 Similar to *post hoc* simulations using parameters from the non-hierarchically fit 2LR\_γ  
372 model, we observed moderate-to-high correlations between empirical and simulated data  
373 using parameters obtained from the hierarchically fit model [ $\rho_{RL\_control} = 0.65, p < 0.01$ ;  
374  $\rho_{RL\_stress} = 0.84, p < 0.01$ ;  $\rho_{EL\_control} = 0.37, p = 0.02$ ;  $\rho_{EL\_stress} = 0.78, p < 0.01$ ; see Figure  
375 Supplement 6]. All in all, these results confirm parameter stability within the 2LR\_γ  
376 architecture.

377            In light of model fitting results, post-hoc simulations, model and parameter  
378 recoverability analyses, we used parameters and trial-by-trial predictions of the non-  
379 hierarchically fit 2LR\_γ model in all analyses reported below.

380 **Figure 4**

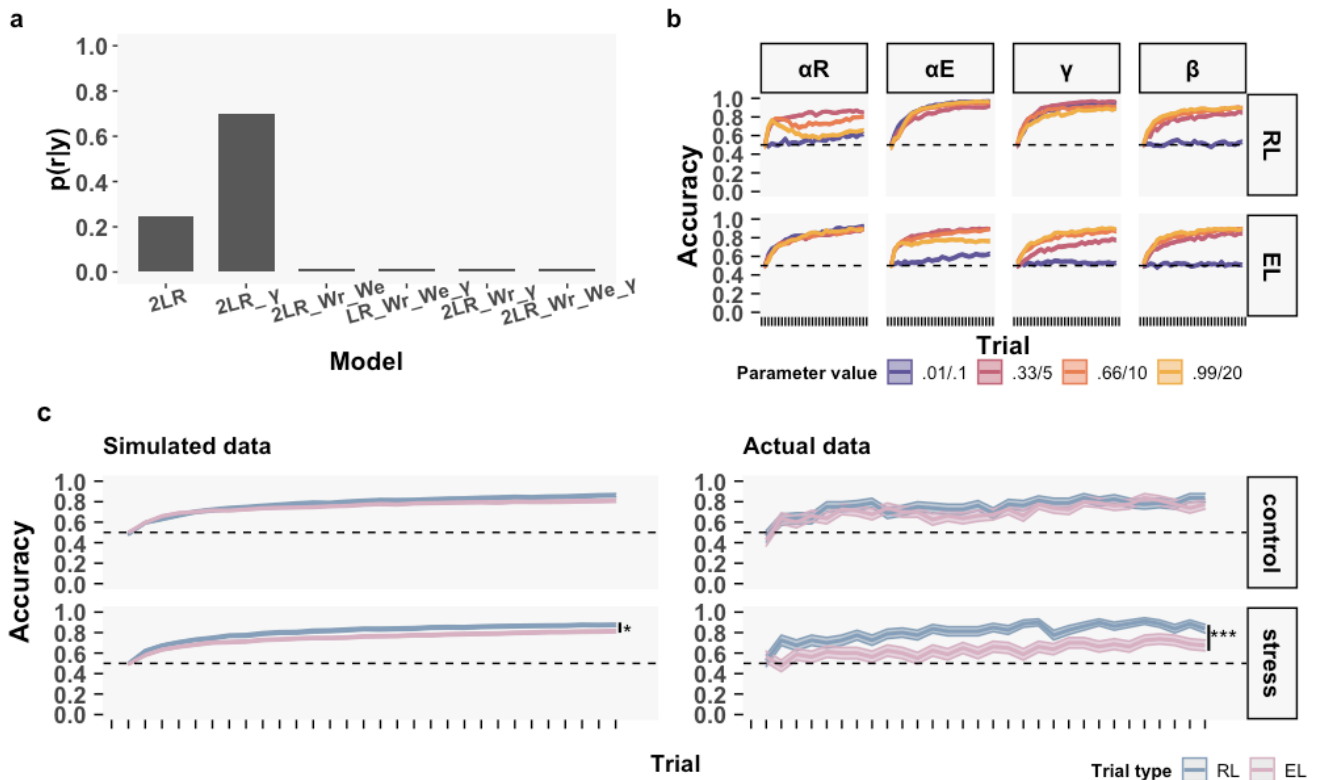

381 Accuracy Trial Trial type RL EL

382 **Model selection, demonstrations, and *post hoc* simulations of the winning model.**

383 Panel **a**: Expectation of the posterior for all candidate models. Panel **b**: Model

384 demonstrations. To demonstrate how different parameter values within the 2LR\_γ

385 architecture impact choice preferences for the optimal stimulus (“accuracy”), α<sub>R</sub>, α<sub>E</sub>, and γ

386 were set to 0.01/0.33/0.66/0.99, while β, a non-linear parameter, was set to 0.1/5/10/20.

387 Parameter effects were always demonstrated for a single parameter (columns), while all other

388 parameter values were kept constant (α<sub>R</sub> and α<sub>E</sub>=0.25, γ=1, β=25). Greater values of α<sub>R</sub> and

389 α<sub>E</sub> selectively increase the speed with which the agent develops a preference for the optimal

390 RL and EL stimulus, respectively. Lower values of γ produce an asymmetric decision-

391 making policy that emphasises reward value over action cost, leading to better performance

392 on RL versus EL trials, while greater values of γ correct this asymmetric choice bias. Finally,

393 greater β values lead to more deterministic sampling of optimal stimuli. Panel **c**: Post-hoc

394 simulations after fixing  $\beta$  and  $\gamma$  to group-level averages. Coloured lines represent mean  $\pm$  SD.  
395 Dashed lines denote chance level (0.5). \*:  $p < 0.05$ , \*\*:  $p < 0.01$ , \*\*\*:  $p < 0.001$ .

396

397 **Acute stress selectively reduces the difference between reward and action cost learning**  
398 **rates**

399 Comparing 2LR\_ $\gamma$  parameters between conditions, we observed a significant Condition-by-  
400 Learning Rate ( $\alpha_R$ ,  $\alpha_E$ ) interaction [ $F(1,78) = 6.42$ ,  $p = 0.01$ ,  $n^2_G = 0.03$ ; 95% highest density  
401 interval (HDI) for Bayesian mixed ANOVA = -0.405 to -0.023, mean = -0.219]. with greater  
402 EPE relative to RPE learning rates in no-stress control participants [ $t(39) = -4.75$ ,  $p < 0.001$ ],  
403 while learning rates in the acute stress group did not significantly differ [ $t(39) = -1.61$ ,  
404  $p = 0.116$ ]. No between-group differences in  $\alpha_R$  and  $\alpha_E$  or in the other parameters ( $\gamma$ ,  $\beta$ ) were  
405 observed (all  $p$ -values  $> 0.05$ ) (Figure 5).

406 Paradoxically, symmetric reward value and action cost learning rates in the presence  
407 of lower values of  $\gamma$  will lead to more efficient RL compared to EL. This is because lower  
408 values of  $\gamma$  bias decisions towards reward value (via *greater* discounting of action cost) and  
409 similar absolute values of  $\alpha_R/\alpha_E$  will not counteract this bias. *Asymmetric* learning rates  
410 ( $\alpha_E > \alpha_R$ ) in combination with lower values of  $\gamma$ , however, will lead to more symmetric  
411 performance on RL and EL trials via more efficient updating of action cost versus reward  
412 expectations. This interpretation is supported by our demonstration of model parameters  
413 (Figure 4b) and *post hoc* simulations (Figure 4c), as well as the observation that lower values  
414 of  $\gamma$  (i.e., greater action cost discounting) were associated with greater learning rate  
415 asymmetry ( $\alpha_E > \alpha_R$ ; more efficient EL) in no-stress controls ( $\rho = -0.40$ ,  $p = 0.040$ ), who  
416 displayed similar RL and EL performance. These results demonstrate that, in a context where  
417 all decisions involve a potential cost and benefit, acute stress selectively reduces the  
418 difference between EPE and RPE learning rates, while leaving action cost discounting and

419 choice stochasticity unaffected. The direction of the change in learning rates (i.e., greater  
420 similarity) implies a stress-induced failure to modulate learning rates in the service of  
421 overcoming an asymmetric choice bias that emphasises reward value.

422 In analyses using posterior parameters obtained from the hierarchically fit model, we  
423 recovered the key Condition-by-Learning Rate interaction (95% HDI for Bayesian mixed  
424 ANOVA = -0.406 to -0.128, mean=-0.269) [and acute stress and no-stress control subjects  
425 differed from each other on  $\alpha_E$  (95% HDI = 0.0841 to 0.281, mean=0.183) but not  $\alpha_R$  (95%  
426 HDI = -0.186 to 0.0102, mean=-0.0872)] (Figure Supplement 7). Similar to the non-  
427 hierarchically fit parameters, acute stress and control subjects did not differ on posterior  
428 estimates of  $\gamma$  (95% HDI = -0.0914 to 0.139, mean=0.0182) and  $\beta$  (95% HDI = -0.0331 to  
429 0.213, mean=0.0895).  
430

431 **Figure 5**

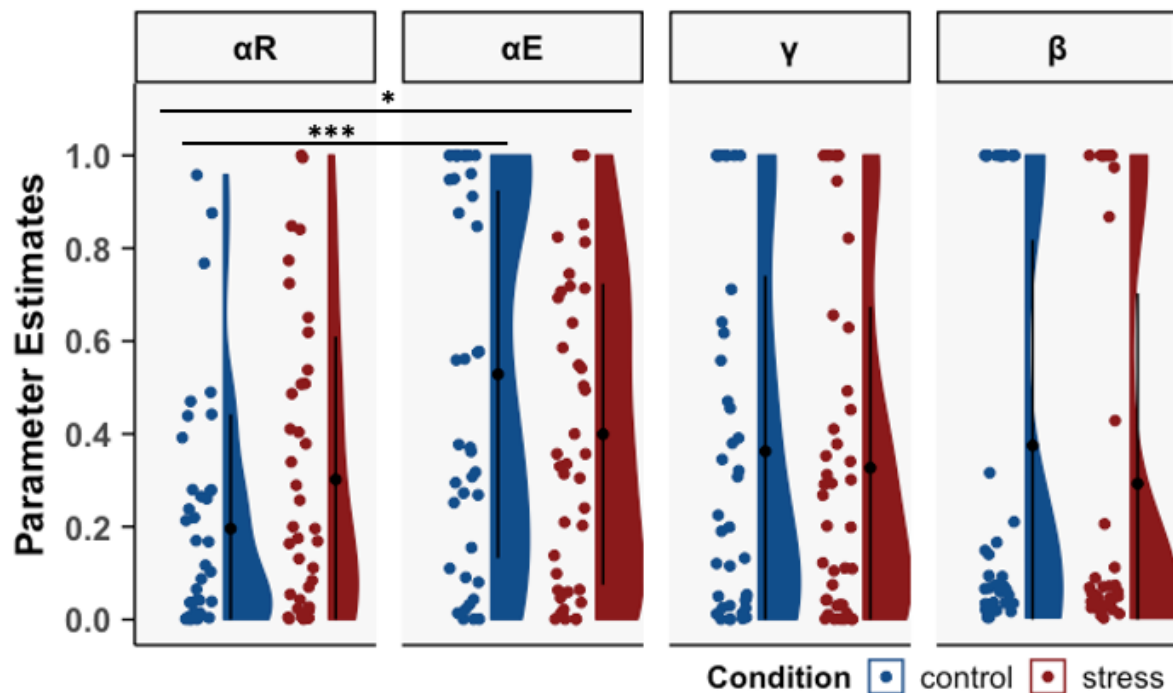

432

433 **Acute stress reduces the difference between reward and effort prediction error learning**

434 **rates.**

435 Free parameters ( $\alpha R$ ,  $\alpha E$ ,  $\gamma$ ,  $\beta$ ) of the winning 2LR\_  $\gamma$  model for both groups. Black lines

436 denote means  $\pm$  SD, dots represent individual data points, and the violin-like shape denotes

437 distribution and frequency of the data. \*:  $p < 0.05$ , \*\*:  $p < 0.01$ , \*\*\*:  $p < 0.001$ .

438

439 **Pupil size fluctuations track asymmetric cost-benefit reinforcement learning during**

440 **acute stress**

441 We employed pupillometry to better understand whether task-relevant computational

442 processes may be encoded by fluctuations in pupil dilation, which are thought to be

443 controlled by ascending midbrain modulatory systems that play a role in value-based

444 decision-making and the acute stress response (Arnsten, 2015; Hermans et al., 2011; Joshi,

445 Li, Kalwani, & Gold, 2016).

446 In model-free analyses – that is, comparing bins of pupillometry data between  
447 conditions - we observed no main effect of Condition on pupil size fluctuations during  
448 choice, effort outcome, and reward outcome epochs, suggesting that acute stress was not  
449 associated with more general changes in pupil size (all bin-level  $p > 0.05$ ; Figure 6, a. Model-  
450 free; Figure Supplement 8 for all effort trials).

451 Next, we conducted model-based pupillometry analyses (Lawson, Bisby, Nord,  
452 Burgess, & Rees, 2020) to understand how trial-wise estimates of computational processes of  
453 interest were encoded by fluctuations in pupil size. These analyses revealed effects of  
454 Condition on pupil encoding of subjective decision value, EPEs and RPEs (Figure 6, b.  
455 Model-based) in a manner commensurate with task performance results. First, immediately  
456 prior to the stimulus choice, acute stress reduced pupil encoding of subjective decision value,  
457 as evidenced by the absence of an association between pupil size and subjective decision  
458 value (control > stress; stress n.s., control > 0). Second, briefly after the presentation of effort  
459 avoidance outcomes, both groups exhibited different pupil size-EPE associations, with no-  
460 stress controls showing a non-significant numerically positive association between pupil size  
461 and action cost prediction errors (control > stress, both groups n.s. different from 0). In model-  
462 based analyses using all effort outcome trials, we were not able to uncover group differences  
463 in pupil encoding of EPEs, which were likely eclipsed by prominent grip force-related effects  
464 on pupil size (Figure Supplement 8). Third, during the reward outcome phase, acute stress  
465 participants exhibited greater positive associations between pupil size and RPEs compared to  
466 no-stress controls (stress > control, stress > 0, control n.s.). The average pupil size-RPE slope  
467 for bins in which no-stress control and acute stress participants differed (Figure 6b) correlated  
468 significantly with stress-induced changes in SBP [ $\rho_{stress}(38) = -0.41$ ,  $p(\text{permutation}) = 0.019$ ]  
469 and PANAS negative affect changes [ $\rho_{stress} = -0.46$ ,  $p(\text{permutation}) = 0.005$ ] in the stress group.

470 Crucially, group differences in pupil encoding of subjective decision value, EPEs, and  
471 RPEs imply that the ascending neuromodulatory systems may have facilitated a stress-  
472 induced shift in asymmetric cost versus benefit learning.

473

474 **Figure 6**

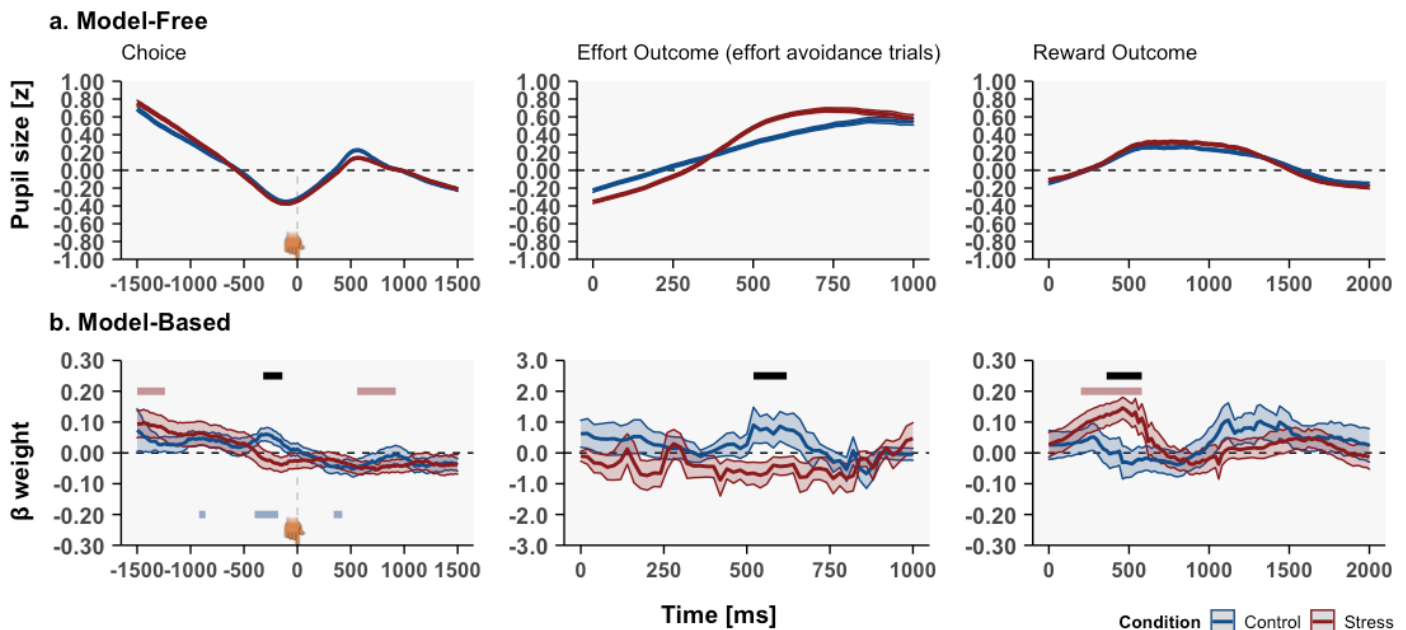

475

476 **Model-based analysis reveals altered pupil encoding of prediction errors and decision**  
477 **value during acute stress .**

478 **a.** Model-free analyses of pupil size during choice, effort outcome, and reward outcome

479 phase revealed no main effect of Condition (no-stress control, acute stress). **b.** Model-based

480 analyses revealed a stress-induced shift in pupil encoding of subjective decision value (left),

481 action cost prediction errors (middle) and reward prediction errors (right). Black line

482 indicates significant main effect of Condition; blue and red line indicate significance against

483 zero for no-stress control and acute stress groups, respectively (cluster and bin level

484  $\alpha_{\text{permute}} < 0.05$ , 2000 permutations). Group differences in pupil encoding of action cost and

485 reward prediction errors were observed at similar times (note the x-axis differences for effort



486 outcome and reward outcome epochs). Source files of pupillometry data used for the analyses  
487 are available in Figure 6 – Source Data 2.

488

## 489 **Discussion**

490 Stress-induced alterations in adaptive decision-making are commonly studied using  
491 paradigms that isolate positive and negative reinforcement, such as the receipt of a reward or  
492 avoidance of a loss. However, it remains poorly understood how acute stress affects the  
493 complex process that entails learning about costs *and* benefits, a critical and pervasive feature  
494 of everyday decisions. Participants completed a paradigm in which all actions (stimulus  
495 choices) contained a potential cost (exerting physical effort) and a financial benefit (€0.20).  
496 Crucially, acute stress induced a shift in reinforcement learning strategies that improved  
497 maximization of monetary rewards relative to minimisation of energy expenditure. When  
498 presented with novel stimulus arrangements and in the absence of feedback, individuals in  
499 the acute stress condition, moreover, exhibited better discrimination of stimulus reward value  
500 compared to action cost.

501 Relative improvements in reward versus action cost learning align well with previous  
502 reports of enhanced reward learning during acute stress (Byrne, Cornwall, & Worthy, 2019;  
503 Lighthall et al., 2013; Petzold et al., 2010), although such effects may depend on stressor  
504 timing (Joëls, Pu, Wiegert, Oitzl, & Krugers, 2006), stressor type (Carvalho et al., 2020),  
505 and/or sample characteristics (Evans & Hampson, 2015; Morris & Rottenberg, 2015). While  
506 reports on action cost learning during acute stress are scarce, acute exposure to stress in  
507 rodents impairs cost-benefit decisions via a selective change in sensitivity to physical effort, a  
508 process mediated by corticotropin-releasing factor and dopamine (Bryce & Floresco, 2016).  
509 Our analyses of win-stay/lose-shift rates indicate that asymmetric cost-benefit learning can be

510 driven by a relative increase in the sensitivity to monetary gains compared to the avoidance  
511 of costly deterrents.

512         How might maximization of reward value take precedence over minimisation of  
513 action cost? Acute stress leads to a redistribution of finite cognitive resources (Hermans et  
514 al., 2014): this process limits the availability of computationally intensive strategies,  
515 including working memory (Otto, Raio, Chiang, Phelps, & Daw, 2013; Qin, Hermans, van  
516 Marle, Luo, & Fernández, 2009) and goal-directed instrumental actions (Lars Schwabe &  
517 Wolf, 2011). Assuming that acute stress does not merely increase random responding - which  
518 we verified via the choice stochasticity model parameter - a computationally cheap heuristic  
519 in our task should present itself as better learning for one modality over the other. Increased  
520 energy availability (Hermans et al., 2014), insensitivity to aversive stimuli (Timmers et al.,  
521 2018), and impaired aversive value updating (Raio et al., 2017) under stress may have  
522 reduced the ability – or urgency – to dedicate cognitive resources to strategies that minimize  
523 action cost. Importantly, effort expenditure increases the perceived value of rewards  
524 (Hernandez Lallement et al., 2014; Inzlicht, Shenhav, & Olivola, 2018). Thus, frequent  
525 expenditure of physical effort, due to suboptimal action cost learning, may increase the  
526 perceived value of rewards, and thus tilt learning towards the maximization of reward value.

527         Using a computational model of reinforcement learning (Skvortsova et al., 2017;  
528 Skvortsova et al., 2014), we confirmed that biased cost-benefit learning can arise when  
529 inappropriate (i.e. more similar) importance is afforded to teaching signals that convey  
530 information about reward value (RPEs) and action cost (EPEs). Humans display presumably  
531 instinctive biases, such as more efficient learning from better-than-expected outcomes  
532 (Lefebvre, Lebreton, Meyniel, Bourgeois-Gironde, & Palminteri, 2017) (compared to worse-  
533 than-expected outcomes) and asymmetric “Go”/approach learning (Guitart-Masip et al.,  
534 2012) (compared to “No-Go”/avoidance learning), the latter being a bias that is also

535 modulated by acute stress (de Berker et al., 2016). From this perspective, no-stress controls,  
536 who assigned greater importance to EPEs than RPEs, may have used a computationally  
537 costly learning strategy that provides counterweight to a decision-making policy that is  
538 biased towards the reward value of actions (captured by action cost discounting parameter  $\gamma$ ).  
539 Paradoxically, when decisions are by default tilted towards reward value, similar reward and  
540 action cost learning rates will facilitate reward learning but hamper action cost learning.  
541 Reduced learning rate asymmetry in the presence of action cost discounting may therefore  
542 represent a computational reformulation of a heuristic that is employed when cognitively  
543 demanding learning strategies are unavailable and the policy towards energy expenditure is  
544 more liberal, such as during acute stress.

545       Importantly, stress-induced changes in task performance may crucially depend on the  
546 release of catecholamines in neural circuits that support motivation and learning. Dopamine's  
547 actions at D1 and D2 receptors in the basal ganglia mediate approach and avoidance learning  
548 (Frank, Seeberger, & Reilly, 2004), and acute stress can improve associative learning by  
549 augmenting reward-evoked DA bursts in selective striatal subdivisions (Stelly, Tritley,  
550 Rafati, & Wanat, 2020). Dopamine's enhancement via L-DOPA administration, moreover,  
551 improves reward but not action cost learning (Skvortsova et al., 2017). To the degree that  
552 pupillometry can be considered a proxy measure of activity of ascending neuromodulatory  
553 systems, these findings are consistent with greater encoding of RPEs by pupil size  
554 fluctuations during acute stress. Negative correlations between SBP and PANAS negative  
555 affect and RPE-pupil size slopes suggest that primarily moderately stressed participants  
556 displayed a preference for maximizing reward value, which might be consistent with an  
557 inverted U-shape relationship between cognitive performance and DA transmission which is  
558 modulated by stress (Arnsten & Goldman-Rakic, 1998; Baik, 2020). Noradrenaline, however,  
559 mobilizes available energy to complete effortful actions and *locus coeruleus* neurons track

560 energy expenditure (Varazzani et al., 2015). Stress-induced sAA concentrations, increased  
561 heart rate, and group differences in the association between pupil size fluctuations and EPEs  
562 all point to the involvement of the noradrenaline system. Thus, our model-based pupillometry  
563 and stress-induction results hint at stress-sensitive dopaminergic and noradrenergic  
564 mechanisms that may regulate cost and benefit learning, which could be explored in future  
565 work using targeted pharmacological approaches.

566         The results presented here may improve understanding of stress-related  
567 psychopathology. While asymmetric cost-benefit learning during acute stress may be  
568 beneficial to reach a desired goal state (e.g., safety) despite high action cost, such strategies  
569 could also be maladaptive. For example, stress exposure can lead to drug or smoking relapse  
570 (L. Schwabe, Dickinson, & Wolf, 2011), a context in which reward value and action cost  
571 may be misaligned. Cost-benefit reinforcement learning may provide a useful framework to  
572 test hypotheses regarding stress-related impairments in learning and decision-making.

573         Some study limitations need to be acknowledged. First, pupil dilation associated with  
574 effort expenditure greatly reduced our power to detect robust associations between EPE  
575 encoding and pupil size fluctuations. Future studies should, therefore, consider a temporal  
576 delay between effort outcome and effort expenditure phases. Second, while our  
577 computational model was able to recover overall task performance patterns in both groups,  
578 such effects were subtle and dependent on the contribution of other (non-learning)  
579 parameters, which may highlight the importance of interindividual differences in model  
580 parameters.

581         To summarize, we present evidence of asymmetric effects of acute stress on cost  
582 versus benefit reinforcement learning during acute stress, which computational analyses of  
583 task behaviour explain as a failure to assign appropriate importance to RPEs versus EPEs,  
584 and our model-based pupillometry tentatively link to activity of ascending midbrain

585 neuromodulatory systems. These results highlight for the first time how learning under acute  
586 stress can be tilted in favour of acquiring good things and away from the avoidance of costly  
587 things.

588

## 589 **Materials and Methods**

### 590 **Participants**

591 Adult participants were recruited via paper and online advertisements. All participants were  
592 screened for a DSM-5 psychiatric and/or neurological disorder, substance use, endocrine  
593 and/or vascular disorder, abnormal BMI ( $>40$  or  $<18$ ), smoking and drinking ( $>10$   
594 cigarettes/units per week), psychotropic medication use (lifetime) and hormonal  
595 contraceptive use (current; female participants only). All participants completed the ~2-hour  
596 experiment between 12:00h and 18:00h to minimize diurnal cortisol fluctuations (Bailey &  
597 Heitkemper, 2001). Participants were instructed to refrain from alcohol (starting the evening  
598 before the day of the experiment), smoking, food, caffeine intake, strenuous physical activity  
599 and brushing their teeth (all  $>2$  hr prior to experiment), which was verified verbally at the  
600 start of the session. Four participants were excluded due to an equipment failure ( $n=4$ ). Three  
601 participants quit during stress-induction ( $n=2$ ) or task procedures ( $n=1$ ). Because chance-  
602 level performance on reinforcement learning tasks might indicate a successful manipulation,  
603 a lack of motivation, or a failure to comprehend the task instructions, participants that  
604 performed at or below chance level (0.5) on both RL and/or both EL pairs near the end of the  
605 experiment (final 10 presentations) were excluded ( $n=13$ ; 6 acute stress, 7 no-stress control).  
606 Including these participants did not alter our key finding that acute stress was associated with  
607 asymmetric cost versus benefit learning (see Results). Pupillometry and neuroendocrine data  
608 were not processed further for these participants. The study was approved by the ethics  
609 committee of the Faculty of Psychology and Neuroscience, Maastricht University (ERCPN-

610 197\_03\_08\_2018) and carried out in accordance with the Declaration of Helsinki.

611 Participants were remunerated in gift vouchers or research participation credits. Task

612 earnings were paid out in gift vouchers.

613

#### 614 **Acute stress induction**

615 The MAST is a validated stress-induction paradigm combining both psychological and

616 physiological stressors, and robustly increases neuroendocrine, physiological, and subjective

617 indices of acute stress (Smeets et al., 2012). During a 5-min preparation phase, participants

618 are instructed about the upcoming task via oral and visually displayed instructions, followed

619 by a 10-min stress-induction phase consisting of alternating blocks of cold-water immersion

620 (non-dominant hand; 2°C) and backward counting in steps of 17 (while receiving negative

621 evaluative feedback from an experimenter), with a (non-recording) camera continuously

622 directed at the participant's face, which was displayed to the participant on a second display.

623 During the MAST no-stress control condition, participants immerse their hand in lukewarm

624 water (36°C) and perform simple mental arithmetic, e.g., counting from 1 to 25, without

625 receiving feedback or fake camera recordings.

626

#### 627 **Neuroendocrine, physiological and subjective stress measurements**

628 sCORT and sAA were collected to measure stress-induced increases in hypothalamic-

629 pituitary-adrenal (HPA) axis and sympathetic-adrenal-medullary (SAM) axis activity,

630 respectively (Dickerson & Kemeny, 2004; Koh, Ng, & Naing, 2014). Saliva samples were

631 obtained using synthetic Salivette® devices (Sarstedt, Etten-Leur, the Netherlands) during 3-

632 min sampling periods at 6 time points. A baseline sample was collected 10 min prior to the

633 MAST (baseline:  $t_1 = t_{-10}$ ) and five samples post-MAST ( $t_2 = t_{+0}$ ,  $t_3 = t_{+10}$ ,  $t_4 = t_{+20}$ ,  $t_5 = t_{+30}$ ,  $t_6 =$

634  $t_{+40}$ ). SAA assessments were obtained only for  $t_1$ - $t_4$ , due to the rapid decay of sAA post-stress

635 induction (Dennis Hernaus, Quaedflieg, Offermann, Casales Santa, & van Amelsvoort, 2018;  
636 Nater et al., 2005). For all participants,  $t_2$  marked the starting point for the reward value  
637 maximisation/action cost minimisation task. Samples were stored at  $-20^{\circ}\text{C}$  immediately after  
638 completion of each session. SCORT and sAA levels were determined using a commercially  
639 available luminescence immune assay kit (IBL, Hamburg, Germany) and kinetic reaction  
640 assay (Salimetrics, Penn State, PA, USA), respectively.

641 Systolic blood pressure (SBP) and heart rate (HR) as an index of autonomic nervous  
642 system (ANS) arousal (Schubert et al., 2009; Wright, O'Brien, Hazi, & Kent, 2014) were  
643 assessed at  $t_1$  and  $t_2$  using an OMRON M4-I blood pressure monitor (OMRON Healthcare  
644 Europe B.V., Hoofddorp, The Netherlands). Subjective affect ratings were assessed at  $t_1$  and  
645  $t_2$  using the 20-item Positive and Negative Affect Scale (PANAS) (Watson, Clark, &  
646 Tellegen, 1988).

647

#### 648 **Reward maximization versus action cost minimization reinforcement learning task**

649 All participants completed a probabilistic stimulus selection paradigm during which they  
650 learned to select stimuli with high reward value (20 Eurocents) and avoid stimuli with high  
651 action cost (exerting force above a pre-calibrated individual threshold for a duration of  
652 3000ms). This reinforcement learning task is conceptually similar to a previously-validated  
653 probabilistic action selection task that has been employed to study the neural signatures of  
654 reward and effort prediction errors and dopaminergic drug effects on reward-effort  
655 computations (Skvortsova et al., 2017; Skvortsova et al., 2014). The paradigm was designed  
656 in PsychoPy v3.0.0b11 (Peirce et al., 2019) and presented on a 24" monitor (iiyama ProLite  
657 b2483HSU). Physical effort (in mV/kgf) was registered using a hand-held dynamometer in  
658 combination with a transducer amplifier (DA100C) and data acquisition system (MP160; all  
659 manufactured by BIOPAC Systems, Inc). Individual effort thresholds used throughout the

660 task were obtained by calculating 50% of each participant's maximal voluntary contraction  
661 (MVC) (Le Heron et al., 2018) reached over three calibration trials by squeezing the  
662 dynamometer with the dominant hand.

663 On each of 120 trials, participants chose between two paired distinct black-and-white  
664 images ("stimuli") that were probabilistically associated with both the receipt of a monetary  
665 reward and exertion of physical effort (see Figure 1 for a graphical overview). At trial onset,  
666 a fixation cross flanked by two images was presented; participants chose one image by  
667 pressing the V/B button for the left/right option, respectively. A 440Hz/600Hz tone for  
668 left/right choice (200ms) was presented to confirm the participant's choice. Next, a  
669 thermometer with the command "SQUEEZE" or "DON'T SQUEEZE" was displayed. If  
670 participants were required to exert effort, they were instructed to squeeze the dynamometer  
671 until the mercury level reached the top. The mercury bar only moved if participants exerted  
672 above-threshold levels of force and stopped moving if exerted force fell below. The  
673 cumulative above-threshold time was 3000ms. If no effort production was required, an  
674 animation of a rising mercury bar was displayed (3000ms). Finally, a screen was presented  
675 showing either a €0.20 coin or a crossed-out coin, indicating no reward (3000ms).

676 Participants learned to choose the optimal (most reward or most effort avoiding)  
677 stimulus for four distinct image pairs, 30 presentations each, with yoked reward and action  
678 cost contingencies. For 2/4 pairs, participants could regularly acquire rewards by selecting  
679 one (optimal) stimulus over the (suboptimal) other (henceforth, "reward learning"/RL pairs),  
680 while the probability of having to exert effort was identical for both stimuli. For the other two  
681 pairs, choices of one stimulus were more frequently followed by the avoidance of effort  
682 ("effort learning"/EL pairs), while the probability of reward was kept constant between both.  
683 For all pairs, the probability of the stimulus property that was *kept constant* (reward/effort)



684 was set to a 33.3% chance of positive outcome upon selection (reward/ effort avoidance) and  
685 66.6% chance of negative outcome (no reward/effort).

686 To assess whether any acute stress effects on reward maximization (measured using  
687 RL pairs) and effort cost minimization (measured using EL pairs) learning were potentially  
688 mediated by task difficulty, we employed different difficulty levels for each RL and EL pair.  
689 That is, for one RL and one EL (“easy”) pair, a choice for the optimal stimulus was followed  
690 by a positive outcome in 83% (vs. 17% negative outcome) of all trials (83% negative/17%  
691 positive outcome for suboptimal stimulus); for the other RL and EL (“hard”) pair a choice for  
692 the optimal stimulus was followed by a positive outcome in 70% (vs. 30% negative outcome)  
693 of all trials (and 70% negative/30% positive outcome) for the suboptimal stimulus. This  
694 approach allowed us to disentangle whether acute stress primarily impacted domain-specific  
695 (RL vs. EL) or general (easy vs. hard) reinforcement learning (the latter which also might  
696 involve other cognitive skills that might be beneficial to performance and sensitive to change  
697 under stress, such as working memory (Schoofs, Wolf, & Smeets, 2009). The task  
698 contingencies described above were based on extensive pilot tests to identify a reinforcement  
699 schedule that would enable us to detect stress-induced improvements *and* decreases in task  
700 performance. We selected task contingencies based on pilot sessions involving a no-stress  
701 control condition and chose a reinforcement schedule associated with non-ceiling/floor  
702 performance on RL and EL trials.

703 Following the learning phase, participants completed a surprise test phase, similar to  
704 previous work (D. Hernaus et al., 2019; D. Hernaus et al., 2018). This phase consisted of 64  
705 trials in which participants were presented with the original four, as well as six novel,  
706 stimulus combinations. Participants were asked to choose the stimulus with the highest  
707 reward value or the lowest action cost - depending on a coin or thermometer image presented  
708 in the middle of the screen - and received no choice feedback. This allowed us to assess

709 acquired choice tendencies, as well as generalizability of this information to novel situations.  
710 The four original pairs were presented four times (total n=16) during which we only asked  
711 participants to discriminate on the basis on the reward value (for RL) or action cost (for EL).  
712 For novel stimulus combinations, we only presented stimuli that differed in reward  
713 value/action cost if reward value discrimination/action cost discrimination was assessed (total  
714 n=48: n=4 presentations for the 6 combinations).

715 For every participant, stimuli were randomly assigned to pairs, optimal/suboptimal  
716 stimulus orientation was balanced (50% of all optimal stimulus presentations occurred on the  
717 left-hand side) and misleading outcomes (e.g., negative outcomes for optimal stimuli) were  
718 equally spaced out across the thirty presentations (and balanced for left/right side). Trial  
719 presentation order was pseudo-randomized such that I) a given pair would never be presented  
720 more than twice in a row and II) the gap between two presentations of a given pair was never  
721 greater than four trials.

722 Prior to performing the actual task and prior before acute stress/no-stress control  
723 procedures, participants received standard verbal instructions and completed a 16-trial  
724 practice round of the learning phase. Participants were not informed about stimulus-outcome  
725 contingencies; they were only advised to accrue as much money as possible and avoid  
726 exerting unnecessary effort. A 60% accuracy performance threshold was used to confirm that  
727 participants understood the general task procedure. The practice round was repeated if  
728 participants failed to reach 60% accuracy. To prevent learning, we used deterministic  
729 stimulus-outcome probabilities and different stimuli.

730

### 731 **Computational cost-benefit reinforcement learning model: model space**

732 In an attempt to uncover latent mechanisms by which acute stress affects reward  
733 maximization and/or action cost minimization, we turned to cognitive computational

734 modelling. We employed a modified reinforcement learning framework based on Rescorla  
735 and Wagner (Rescorla, 1972), and used in Skvortsova et al. (Skvortsova et al., 2017;  
736 Skvortsova et al., 2014) to investigate whether acute stress impacted learning about  
737 sensitivity to, and/or discounting of reward value and action cost. We first describe the model  
738 space.

739 Various reinforcement learning models assume that choice preferences of an agent are  
740 updated via the prediction error, i.e., the mismatch between outcome and expectation  
741 (equation 1A, 1B) and the critical quantity that drives learning (Rescorla, 1972):

742

$$743 \quad RPE_{(t)} = r_{(t)} - Q_{R(t)}(s, a) \quad (1A)$$

$$744 \quad EPE_{(t)} = e_{(t)} - Q_{E(t)}(s, a) \quad (1B)$$

745

746 Here,  $Q_{R(t)}(s, a)$  and  $Q_{E(t)}(s, a)$  represent the expected reward value and action cost  
747 (i.e., effort), where  $s$  reflects the given pair and  $a$  refers to the more abstract action of  
748 selecting a stimulus (not to be confused with action selection),  $r_{(t)}$  and  $e_{(t)}$  represent the reward  
749 and effort outcome for the chosen stimulus at trial  $t$ .  $RPE_{(t)}$  and  $EPE_{(t)}$ , thus, represent the RPE  
750 and EPE at trial  $t$ , respectively.

751 In order to allow for the possibility that humans do not calculate the prediction error  
752 against the actual outcome but, rather, what the outcome “feels” like (Huys et al., 2013), we  
753 considered a scenario in which reward and effort outcomes are first multiplied by a free  
754 parameter that captures the weight that reward and effort outcomes receive (“ $W_R$ ” and  $W_E$ ” in  
755 equation 2A and 2B). As the value of these parameters approaches 1, rewards are  
756 increasingly valued more positively, and effort more negatively. These parameters, therefore,  
757 control the maximum size of the prediction error.

758

759 
$$RPE_{(t)} = (r_{(t)} * W_R) - Q_{R(t)}(s, a) \quad (2A)$$

760 
$$EPE_{(t)} = (e_{(t)} * W_E) - Q_{E(t)}(s, a) \quad (2B)$$

761

762 In various formulations of reinforcement learning, such as Q-learning (Watkins &  
763 Dayan, 1992) and the actor-critic framework (Niv, 2009; Rescorla, 1972), the degree to  
764 which prediction errors update choice preferences is represented by  $\alpha$ , the learning rate  
765 (equation 3A), which determines how current prediction errors update choice preferences on  
766 the subsequent trial. High values of  $\alpha$  allow for rapid updating of choice preferences, while a  
767 low  $\alpha$  implies that choice preferences are updated at a slower pace and are thus co-  
768 determined by outcomes further into the past.

769

770 
$$Q_{R(t)}(s, a) = Q_{R(t-1)}(s, a) + \alpha_R * RPE_{(t-1)}(s, a) \quad (3A)$$

771 
$$Q_{E(t)}(s, a) = Q_{E(t-1)}(s, a) + \alpha_E * RPE_{(t-1)}(s, a) \quad (3B)$$

772

773 Extensive evidence suggests that organisms use different learning systems for different types  
774 of information, including reward value and action cost (Palminteri & Pessiglione, 2017;  
775 Skvortsova et al., 2017; Skvortsova et al., 2014) (equation 3A/B). Thus, the use of separate  
776 learning rates for RPEs and EPEs allows for asymmetrical learning about these types of  
777 information.

778 While the learning rate controls the *speed* at which choice preferences are updated,  
779 learning rate (nor reward/effort weight) alone does not explain how learned estimates of  
780 reward value and action cost may compete at the decision stage (i.e., when participants  
781 choose between two stimuli). Agents weight costs against benefits to calculate a subjective  
782 decision value (Pessiglione et al., 2017; Skvortsova et al., 2017), which is used to guide  
783 choices (equation 4).

784

$$785 \quad Q_{(t)}(s, a) = Q_{R(t)}(s, a) - Q_{E(t)}(s, a) \quad (4)$$

786

787 In its simplest form,  $Q$ , the subjective decision value of a stimulus is represented by the  
788 difference between the expected reward and action cost value at trial  $t$  (equation 4)  
789 (Skvortsova et al., 2014). However, this particular operationalization of subjective value does  
790 not take into account the observation that humans tend to discount or prioritize certain types  
791 of information in their decisions (Apps, Grima, Manohar, & Husain, 2015; Inzlicht et al.,  
792 2018). We, therefore, allowed for variation in the calculation of subjective decision value via  
793 action cost discounting (equation 5). While discounting rates can be linear or hyperbolic  
794 (Hartmann, Hager, Tobler, & Kaiser, 2013), here we only considered linear discounting in  
795 light of previous work using a similar task design (Skvortsova et al., 2017; Skvortsova et al.,  
796 2014). As the value of  $\gamma$  approaches zero, action cost discounted increases leading the agent  
797 to ignore action cost/only utilize reward value to make a decision.

798

$$799 \quad Q_{(t)}(s, a) = Q_{R(t)}(s, a) - \gamma * Q_{E(t)}(s, a) \quad (5)$$

800

801 Once the subjective decision value has been computed, the degree to which  
802 participants deterministically sample the optimal stimulus is captured by a softmax decision  
803 function (equation 6).

804

$$805 \quad pr(s, a) = \exp(Q_{(t)}(s, a)) / \sum(\exp(\beta * Q_{(t)}(s))) \quad (6)$$

806

807 Here,  $pr$  is the probability of selecting an action,  $\beta$  is the inverse temperature parameter  
808 that among others captures the balance between exploration and exploitation (Nassar &

809 Frank, 2016),  $Q_{(t)}(s, a)$  is the net value of the chosen option and  $Q_{(t)}(s)$  represents the net  
810 values of both stimuli in the pair.

811 Within the above-described model space our predictions of acute stress effects on reward  
812 maximization and action cost minimization could, thus, be explained by changes in  
813 sensitivity to reward value and/or action cost ( $W_R, W_E$ ), changes in how much weight RPEs  
814 and EPEs are afforded (i.e., learning rates,  $\alpha_R, \alpha_E$ ), and/or changes in the discounting of  
815 reward value by action cost ( $\gamma$ ). If acute stress leads to more random responses, such effects  
816 should be captured by  $\beta$ .

817 Based on our predictions and the obtained pattern of results (most notably asymmetrical  
818 RL/EL performance in the acute stress condition), we considered six candidate models that  
819 could capture these various scenarios: I) a model with 2 distinct learning rates for reward and  
820 effort ( $\alpha_R, \alpha_E$ ) [2LR]; II) a model with 2 learning rates ( $\alpha_R, \alpha_E$ ) and a discounting parameter  
821 ( $\gamma$ ) (2LR\_  $\gamma$ ); III) a model with 2 learning rates ( $\alpha_R, \alpha_E$ ), a reward weight ( $W_R$ ) and an effort  
822 weight parameter ( $W_E$ ) (2LR\_  $W_R$ \_  $W_E$ ), IV) a model with a *single* learning rate ( $\alpha$ ), reward  
823 weight ( $W_R$ ), effort weight ( $W_E$ ), and a discounting ( $\gamma$ ) parameter (LR\_  $W_R$ \_  $W_E$ \_  $\gamma$ ); V) a  
824 model with 2 learning rates ( $\alpha_R, \alpha_E$ ), a reward weight ( $W_R$ ), and a discounting ( $\gamma$ ) parameter  
825 (2LR\_  $W_R$ \_  $\gamma$ ); VI) a model with 2 learning rates ( $\alpha_R, \alpha_E$ ), a reward weight ( $W_R$ ), effort weight  
826 ( $W_E$ ) and discounting ( $\gamma$ ) parameter (2LR\_  $W_R$ \_  $W_E$ \_  $\gamma$ ).

827 Lower/upper bounds for all parameters were set to [0,1] and all models contained a  $\beta$   
828 parameter. Consistent with previous work (Skvortsova et al., 2017; Skvortsova et al., 2014),  
829 reward and action cost outcomes were set to [0,1 for no/yes reward] and [-1,0 for no/yes  
830 effort avoidance], respectively.

## 831 **Pupillometry**

832 Fluctuations in pupil diameter were continuously measured using an SR-Research Eyelink  
833 1000 Tower Mount infrared eye tracker while participants performed the reward  
834 maximization/action cost minimization reinforcement learning task (1000Hz sampling rate,  
835 except for three participants, whose data were obtained at 500Hz). Participants placed their  
836 head on an adjustable chin rest and against a forehead bar to minimize motion. Eye-tracker  
837 calibration was performed at the start of the paradigm, and subsequently every 10 min.  
838 Stimulus luminance was matched using the SHINE toolbox (Willenbockel et al., 2010) in  
839 MATLAB (v. 2014B; The MathWorks, Inc., Natick, Massachusetts, United States). Due to  
840 the COVID-19 pandemic, pupillometry data were not collected for the final eight  
841 participants. Three participants, moreover, failed the quality control for eye-tracking data (2  
842 no-stress control/1 acute stress) leaving a final sample of 69 participants with eye-tracking  
843 data (34 no-stress control/35 acute stress).

844 Eye-tracking data were pre-processed using an open source pre-processing toolbox  
845 (Kret & Sjak-Shie, 2019) and in accordance with previous work (Jackson & Sirois, 2009).  
846 Blinks and other invalid samples, due to dilation speed, deviation from the trend line, and  
847 extreme values (Kret & Sjak-Shie, 2019) were removed, interpolated, smoothed (4Hz low-  
848 pass filter, fourth-order Butterworth filter) (Jackson & Sirois, 2009), z-scored and down-  
849 sampled to 50hz (i.e., 20ms). Bins with fewer than 80% valid samples were removed  
850 (Lawson et al., 2020). For analyses, we considered three epochs of interest: choice (-1500ms  
851 pre-choice - 1500ms post-choice), effort outcome (0-1000ms post-outcome), and reward  
852 outcome (0-2000ms post-outcome). We reduced the duration of the effort outcome epoch to  
853 1000ms to minimize force exertion-related effects on pupil size (see below). Recent work has  
854 shown that expectation violations (prediction errors) are encoded by pupil size fluctuations  
855 within this timeframe (Lawson et al., 2020). Given that we observed large grip force-

856 associated effects on the pupillometry signal (see Figure Supplement 8 middle row, for a  
857 comparison between effort and effort avoidance trials), we limited effort outcome analyses in  
858 the main text to effort avoidance trials, although we also report analyses involving all effort  
859 outcome trials in Figure Supplement 8.

860

### 861 **Statistical analyses**

862 Statistical analyses were conducted using R, version 3.6.2 (Team, 2020) and, where  
863 applicable, results were visualised using Raincloud Plots (Allen, Poggiali, Whitaker,  
864 Marshall, & Kievit, 2019). Acute stress measurements were analysed using mixed ANOVAs  
865 involving Condition (between-factor condition: no-stress control, acute stress induction) and  
866 Time (within-factor: 2 pre/post-MAST or 6 levels for sCORT).

867 For the reward maximisation/action cost minimisation reinforcement learning task, an  
868 accuracy score was calculated by dividing the number of optimal stimulus choices by the  
869 total trial amount ( $n=30$  per pair). Mixed ANOVAs involving Condition, Trial Type (RL, EL)  
870 and Difficulty (Easy, Hard pairs) were carried out. For analyses involving Time effects (i.e.,  
871 repeated presentations of stimulus pairs), accuracy scores were averaged per bin of ten  
872 presentations (presentation 1-10, 11-20, and 21-30). To better understand whether acute  
873 stress effects on task performance were primarily driven by changes in sensitivity to positive  
874 or negative outcomes, win-stay (repeating a choice following a positive outcome) and lose-  
875 shift (choosing the other stimulus following a loss) rates were calculated for RL and EL trials  
876 (Hanneke E. M. den Ouden et al., 2013). For RL trials, we calculated win-stay/lose-shift rates  
877 using reward outcomes (yes/no reward); for EL trials we used effort outcomes (yes/no effort).  
878 We refer to the 2-level factor representing win-stay/lose-shift rates as “Strategy”. For surprise  
879 test trials involving the original four pairs ( $n=4$  presentations per pair), we investigated final  
880 choice tendencies using a one-sample t-test against chance level (0.5). Participants’ ability to



881 discriminate stimuli based on reward value and action cost in novel stimulus arrangements  
882 (n=48, 24 reward value and 24 action cost discrimination trials) were investigated using  
883 mixed ANOVAs involving Condition and Trial Type.

884 Group differences in model parameters from the non-hierarchically fit model were  
885 investigated using Condition-by learning rate ( $\alpha_R$ ,  $\alpha_E$ ) mixed ANOVAs and independent  
886 samples t-tests. Given that we used separate priors for the two groups, we report the Bayesian  
887 analogue of a t-test and mixed-ANOVA (Kruschke, 2014) - a more robust test of group  
888 differences - for posterior parameters obtained from the hierarchically fit model (for  
889 reference, we also report these analyses for the non-hierarchical data).

890 *Post hoc* (simple) main effect analyses for all ANOVAs were conducted using  
891 independent sample (Condition), paired-samples (Time, Trial Type, Strategy), and one-  
892 sample t-tests ( $\neq 0$  or 0.5). Greenhouse–Geisser-corrected statistics were reported when  
893 sphericity assumptions were violated. We report statistical significance as  $p < 0.05$  (two-  
894 sided), but we note that most main and interaction effects involving Condition survived at a  
895 more stringent threshold ( $p < .01$ ), except for some strategy and surprise test phase effects,  
896 which should be interpreted with caution. In case of statistically significant results,  
897 generalized eta square ( $\eta^2_G$ ;  $n^2_G$ ) was reported, with  $n^2_G$  values of 0.02, 0.06, and 0.14  
898 representing a small, medium, and large effect size, respectively (Lakens, 2013).

899 With respect to pupillometry, we conducted model-free and model-based analyses. In  
900 model-free analyses, we investigated group differences in pupil size during the choice, effort  
901 outcome, and reward outcome stage, for every bin of interest. To better understand how  
902 putative activity of ascending neuromodulatory systems may drive stress-induced changes in  
903 computational strategies that support reward maximisation/action cost minimisation learning,  
904 we conducted model-based pupillometry analyses using computational parameters from the  
905 winning (2LR\_  $\gamma$ ) model (Lawson et al., 2020). First, we used linear regression to estimate

906 beta weights for the association between pupil size and computational estimates of task-  
907 related behaviour for every participant, for every epoch, for every bin. For the choice phase,  
908 we regressed trial-wise measures of pupil size against trial-wise estimates of the subjective  
909 decision value (i.e., effort-discounted reward value) of the chosen stimulus. For the effort and  
910 reward outcome phase, trial-wise EPEs and RPEs were the primary predictors of interest,  
911 respectively. Trial number (1-120) and presented images/pair (RL\_easy, RL\_hard, EL\_easy,  
912 EL hard) served as additional predictors of interest for all models. Additional epoch-specific  
913 variables of interest were included for the choice (optimal choice yes/no), effort (action cost  
914 of chosen stimulus, effort avoidance yes/no), and reward (reward value of chosen stimulus,  
915 reward yes/no, effort avoidance yes/no) outcome phase. Similar results were obtained when  
916 repeating the analyses with more elaborate GLMs (e.g., the addition of yes/no most likely  
917 outcome based on reward/effort outcome probabilities [“surprise”] and reward/action cost for  
918 EL/RL trials). Secondly, in group-level GLMs, we compared the resulting beta weights I)  
919 against zero (for the no-stress control/acute stress condition separately), to investigate when  
920 the pupil encoded the computational process of interest, and II) between groups, to assess  
921 stress-induced changes in associations between pupil size and computational processes. To  
922 control the false positive rate, we conducted permutation tests at the bin- and cluster-level  
923 (2000 permutations,  $\alpha_{\text{permute}}=0.05$ ). All correlations were performed using Spearman’s  $\rho$   
924 correlations. Permutation tests were also conducted for correlation analyses involving acute  
925 stress measures and pupil encoding of predictions errors.

926 **Figure 3 – Source Data 1**

927 **Source files for task performance data.**

928 This link contains all task performance data used for the analyses shown in Figure 3. Raw  
929 data can be found under “task\_performance”.

930 <https://osf.io/ydv2q/>

931

932 **Figure 6 – Source Data 2**

933 **Source files for pupillometry data.**

934 This link contains pupillometry data used for the analyses shown in Figure 6. Raw data can  
935 be found under “pupillometry”.

936 <https://osf.io/ydv2q/>

937

938 **Acknowledgements**

939 We are indebted to Drs. Conny Quaedflieg, Edwin S. Dalmaijer, and Ross D. Markello for  
940 advice on stress-induction procedures and paradigm development. We thank Dr. Michael  
941 Frank for advice on hierarchical computational modelling procedures. We thank Katya Brat-  
942 Matchett for involvement in participant recruitment and Truda Driessen for administrative  
943 support.

944

945 **Competing interests**

946 D.H. has received financial compensation as a consultant for P1vital Products Ltd. These  
947 activities were unrelated to the work presented in this manuscript. The authors declare no  
948 competing interests.

949 **References**

- 950 Allen, M., Poggiali, D., Whitaker, K., Marshall, T. R., & Kievit, R. A. (2019). Raincloud  
951 plots: a multi-platform tool for robust data visualization. *Wellcome Open Res*, 4, 63.  
952 doi:10.12688/wellcomeopenres.15191.1
- 953 Apps, M. A. J., Grima, L. L., Manohar, S., & Husain, M. (2015). The role of cognitive effort  
954 in subjective reward devaluation and risky decision-making. *Scientific reports*, 5(1),  
955 16880. doi:10.1038/srep16880
- 956 Arnsten, A. F. (2015). Stress weakens prefrontal networks: molecular insults to higher  
957 cognition. *Nat Neurosci*, 18(10), 1376-1385. doi:10.1038/nn.4087
- 958 Arnsten, A. F., & Goldman-Rakic, P. S. (1998). Noise stress impairs prefrontal cortical  
959 cognitive function in monkeys: evidence for a hyperdopaminergic mechanism. *Arch  
960 Gen Psychiatry*, 55(4), 362-368. doi:10.1001/archpsyc.55.4.362
- 961 Baik, J.-H. (2020). Stress and the dopaminergic reward system. *Experimental & Molecular  
962 Medicine*, 52(12), 1879-1890. doi:10.1038/s12276-020-00532-4
- 963 Bailey, S. L., & Heitkemper, M. M. (2001). Circadian rhythmicity of cortisol and body  
964 temperature: morningness-eveningness effects. *Chronobiology International*, 18(2),  
965 249-261. doi:10.1081/CBI-100103189
- 966 Berghorst, L. H., Bogdan, R., Frank, M. J., & Pizzagalli, D. A. (2013). Acute stress  
967 selectively reduces reward sensitivity. *Front Hum Neurosci*, 7, 133.  
968 doi:10.3389/fnhum.2013.00133
- 969 Bryce, C. A., & Floresco, S. B. (2016). Perturbations in Effort-Related Decision-Making  
970 Driven by Acute Stress and Corticotropin-Releasing Factor.  
971 *Neuropsychopharmacology*, 41(8), 2147-2159. doi:10.1038/npp.2016.15

- 972 Byrne, K. A., Cornwall, A. C., & Worthy, D. A. (2019). Acute stress improves long-term  
973 reward maximization in decision-making under uncertainty. *Brain and Cognition*,  
974 *133*, 84-93. doi:<https://doi.org/10.1016/j.bandc.2019.02.005>
- 975 Cannon, W. B. (1915). *Bodily changes in pain, hunger, fear, and rage. CHAPTER XI: The*  
976 *utility of the bodily changes in pain and great emotion*: D. Appleton and company.
- 977 Carvalho, J., Conceição, V. A., Mesquita, A., & Seara-Cardoso, A. (2020). Acute stress  
978 impairs reward learning in men. *Brain Cogn*, *147*, 105657.  
979 doi:10.1016/j.bandc.2020.105657
- 980 Daw, N. D. (2011). Trial-by-trial data analysis using computational models. *Decision*  
981 *making, affect, and learning: Attention and performance XXIII*, *23*(1).
- 982 de Berker, A. O., Tirole, M., Rutledge, R. B., Cross, G. F., Dolan, R. J., & Bestmann, S.  
983 (2016). Acute stress selectively impairs learning to act. *Scientific reports*, *6*(1), 29816.  
984 doi:10.1038/srep29816
- 985 de Kloet, E. R., Joëls, M., & Holsboer, F. (2005). Stress and the brain: from adaptation to  
986 disease. *Nature Reviews Neuroscience*, *6*(6), 463-475. doi:10.1038/nrn1683
- 987 Del Arco, A., Park, J., & Moghaddam, B. (2020). Unanticipated Stressful and Rewarding  
988 Experiences Engage the Same Prefrontal Cortex and Ventral Tegmental Area  
989 Neuronal Populations. *eneuro*, *7*(3), ENEURO.0029-0020.2020.  
990 doi:10.1523/ENEURO.0029-20.2020
- 991 den Ouden, H. E., Swart, J. C., Schmidt, K., Fekkes, D., Geurts, D. E., & Cools, R. (2015).  
992 Acute serotonin depletion releases motivated inhibition of response vigour.  
993 *Psychopharmacology (Berl)*, *232*(7), 1303-1312. doi:10.1007/s00213-014-3762-4
- 994 den Ouden, Hanneke E. M., Daw, Nathaniel D., Fernandez, G., Elshout, Joris A., Rijpkema,  
995 M., Hoogman, M., . . . Cools, R. (2013). Dissociable Effects of Dopamine and

- 996 Serotonin on Reversal Learning. *Neuron*, 80(4), 1090-1100.  
997 doi:<https://doi.org/10.1016/j.neuron.2013.08.030>
- 998 Dickerson, S. S., & Kemeny, M. E. (2004). Acute stressors and cortisol responses: a  
999 theoretical integration and synthesis of laboratory research. *Psychol Bull*, 130(3), 355-  
1000 391. doi:10.1037/0033-2909.130.3.355
- 1001 Evans, K. L., & Hampson, E. (2015). Sex-dependent effects on tasks assessing reinforcement  
1002 learning and interference inhibition. *Frontiers in psychology*, 6, 1044-1044.  
1003 doi:10.3389/fpsyg.2015.01044
- 1004 Frank, M. J., Seeberger, L. C., & Reilly, R. C. (2004). By Carrot or by Stick: Cognitive  
1005 Reinforcement Learning in Parkinsonism. *science*, 306(5703), 1940.  
1006 doi:10.1126/science.1102941
- 1007 Frey, A.-L., Frank, M. J., & McCabe, C. (2019). Social reinforcement learning as a predictor  
1008 of real-life experiences in individuals with high and low depressive symptomatology.  
1009 *Psychological Medicine*, 1-8. doi:10.1017/S0033291719003222
- 1010 Friedman, A., Homma, D., Bloem, B., Gibb, L. G., Amemori, K. I., Hu, D., . . . Graybiel, A.  
1011 M. (2017). Chronic Stress Alters Striosome-Circuit Dynamics, Leading to Aberrant  
1012 Decision-Making. *Cell*, 171(5), 1191-1205.e1128. doi:10.1016/j.cell.2017.10.017
- 1013 Guitart-Masip, M., Huys, Q. J. M., Fuentemilla, L., Dayan, P., Duzel, E., & Dolan, R. J.  
1014 (2012). Go and no-go learning in reward and punishment: interactions between affect  
1015 and effect. *Neuroimage*, 62(1), 154-166. doi:10.1016/j.neuroimage.2012.04.024
- 1016 Hartmann, M. N., Hager, O. M., Tobler, P. N., & Kaiser, S. (2013). Parabolic discounting of  
1017 monetary rewards by physical effort. *Behavioural Processes*, 100, 192-196.  
1018 doi:<https://doi.org/10.1016/j.beproc.2013.09.014>

- 1019 Hauser, T. U., Eldar, E., & Dolan, R. J. (2017). Separate mesocortical and mesolimbic  
1020 pathways encode effort and reward learning signals. *Proceedings of the National*  
1021 *Academy of Sciences*, 114(35), E7395. doi:10.1073/pnas.1705643114
- 1022 Hermans, E. J., Henckens, M. J. A. G., Joëls, M., & Fernández, G. (2014). Dynamic  
1023 adaptation of large-scale brain networks in response to acute stressors. *Trends in*  
1024 *neurosciences*, 37(6), 304-314. doi:<https://doi.org/10.1016/j.tins.2014.03.006>
- 1025 Hermans, E. J., van Marle, H. J. F., Ossewaarde, L., Henckens, M. J. A. G., Qin, S., van  
1026 Kesteren, M. T. R., . . . Fernández, G. (2011). Stress-Related Noradrenergic Activity  
1027 Prompts Large-Scale Neural Network Reconfiguration. *science*, 334(6059), 1151.  
1028 doi:10.1126/science.1209603
- 1029 Hernandez Lallement, J., Kuss, K., Trautner, P., Weber, B., Falk, A., & Fliessbach, K.  
1030 (2014). Effort increases sensitivity to reward and loss magnitude in the human brain.  
1031 *Social cognitive and affective neuroscience*, 9(3), 342-349. doi:10.1093/scan/nss147
- 1032 Hernaus, D., Frank, M. J., Brown, E. C., Brown, J. K., Gold, J. M., & Waltz, J. A. (2019).  
1033 Impaired Expected Value Computations in Schizophrenia Are Associated With a  
1034 Reduced Ability to Integrate Reward Probability and Magnitude of Recent Outcomes.  
1035 *Biol Psychiatry Cogn Neurosci Neuroimaging*, 4(3), 280-290.  
1036 doi:10.1016/j.bpsc.2018.11.011
- 1037 Hernaus, D., Gold, J. M., Waltz, J. A., & Frank, M. J. (2018). Impaired Expected Value  
1038 Computations Coupled With Overreliance on Stimulus-Response Learning in  
1039 Schizophrenia. *Biol Psychiatry Cogn Neurosci Neuroimaging*, 3(11), 916-926.  
1040 doi:10.1016/j.bpsc.2018.03.014
- 1041 Hernaus, D., Quaedflieg, C. W., Offermann, J. S., Casales Santa, M. M., & van Amelsvoort,  
1042 T. (2018). Neuroendocrine stress responses predict catecholamine-dependent working

- 1043 memory-related dorsolateral prefrontal cortex activity. *Social cognitive and affective*  
1044 *neuroscience*, 13(1), 114-123.
- 1045 Huys, Q. J., Pizzagalli, D. A., Bogdan, R., & Dayan, P. (2013). Mapping anhedonia onto  
1046 reinforcement learning: a behavioural meta-analysis. *Biology of mood & anxiety*  
1047 *disorders*, 3(1), 12-12. doi:10.1186/2045-5380-3-12
- 1048 Inzlicht, M., Shenhav, A., & Olivola, C. Y. (2018). The Effort Paradox: Effort Is Both Costly  
1049 and Valued. *Trends in cognitive sciences*, 22(4), 337-349.  
1050 doi:10.1016/j.tics.2018.01.007
- 1051 Jackson, I., & Sirois, S. (2009). Infant cognition: going full factorial with pupil dilation. *Dev*  
1052 *Sci*, 12(4), 670-679. doi:10.1111/j.1467-7687.2008.00805.x
- 1053 Joëls, M., Pu, Z., Wiegert, O., Oitzl, M. S., & Krugers, H. J. (2006). Learning under stress:  
1054 how does it work? *Trends in cognitive sciences*, 10(4), 152-158.  
1055 doi:<https://doi.org/10.1016/j.tics.2006.02.002>
- 1056 Joshi, S., Li, Y., Kalwani, R. M., & Gold, J. I. (2016). Relationships between Pupil Diameter  
1057 and Neuronal Activity in the Locus Coeruleus, Colliculi, and Cingulate Cortex.  
1058 *Neuron*, 89(1), 221-234. doi:10.1016/j.neuron.2015.11.028
- 1059 Klein-Flügge, M. C., Kennerley, S. W., Friston, K., & Bestmann, S. (2016). Neural  
1060 signatures of value comparison in human cingulate cortex during decisions requiring  
1061 an effort-reward trade-off. *Journal of Neuroscience*, 36(39), 10002-10015.
- 1062 Koh, D., Ng, V., & Naing, L. (2014). Alpha Amylase as a Salivary Biomarker of Acute  
1063 Stress of Venepuncture from Periodic Medical Examinations. *Frontiers in Public*  
1064 *Health*, 2(121). doi:10.3389/fpubh.2014.00121
- 1065 Kret, M. E., & Sjak-Shie, E. E. (2019). Preprocessing pupil size data: Guidelines and code.  
1066 *Behav Res Methods*, 51(3), 1336-1342. doi:10.3758/s13428-018-1075-y
- 1067 Kruschke, J. (2014). Doing Bayesian data analysis: A tutorial with R, JAGS, and Stan.



- 1068 Lakens, D. (2013). Calculating and reporting effect sizes to facilitate cumulative science: a  
1069 practical primer for t-tests and ANOVAs. *Frontiers in psychology*, 4, 863-863.  
1070 doi:10.3389/fpsyg.2013.00863
- 1071 Lawson, R. P., Bisby, J., Nord, C. L., Burgess, N., & Rees, G. (2020). The Computational,  
1072 Pharmacological, and Physiological Determinants of Sensory Learning under  
1073 Uncertainty. *Current Biology*. doi:<https://doi.org/10.1016/j.cub.2020.10.043>
- 1074 Le Heron, C., Plant, O., Manohar, S., Ang, Y. S., Jackson, M., Lennox, G., . . . Husain, M.  
1075 (2018). Distinct effects of apathy and dopamine on effort-based decision-making in  
1076 Parkinson's disease. *Brain*, 141(5), 1455-1469. doi:10.1093/brain/awy110
- 1077 Lefebvre, G., Lebreton, M., Meyniel, F., Bourgeois-Gironde, S., & Palminteri, S. (2017).  
1078 Behavioural and neural characterization of optimistic reinforcement learning. *Nature*  
1079 *Human Behaviour*, 1(4), 0067. doi:10.1038/s41562-017-0067
- 1080 Lighthall, N. R., Gorlick, M. A., Schoeke, A., Frank, M. J., & Mather, M. (2013). Stress  
1081 modulates reinforcement learning in younger and older adults. *Psychology and aging*,  
1082 28(1), 35-46. doi:10.1037/a0029823
- 1083 Meyniel, F., Goodwin, G. M., Deakin, J. W., Klinge, C., MacFadyen, C., Milligan, H., . . .  
1084 Gaillard, R. (2016). A specific role for serotonin in overcoming effort cost. *Elife*, 5,  
1085 e17282. doi:10.7554/eLife.17282
- 1086 Morris, B. H., & Rottenberg, J. (2015). Heightened reward learning under stress in  
1087 generalized anxiety disorder: A predictor of depression resistance? *Journal of*  
1088 *abnormal psychology*, 124(1), 115.
- 1089 Myung, J. I., Tang, Y., & Pitt, M. A. (2009). Evaluation and comparison of computational  
1090 models. *Methods Enzymol*, 454, 287-304. doi:10.1016/s0076-6879(08)03811-1

- 1091 Nassar, M. R., & Frank, M. J. (2016). Taming the beast: extracting generalizable knowledge  
1092 from computational models of cognition. *Current opinion in behavioral sciences*, *11*,  
1093 49-54. doi:10.1016/j.cobeha.2016.04.003
- 1094 Nater, U. M., Rohleder, N., Gaab, J., Berger, S., Jud, A., Kirschbaum, C., & Ehlert, U.  
1095 (2005). Human salivary alpha-amylase reactivity in a psychosocial stress paradigm.  
1096 *Int J Psychophysiol*, *55*(3), 333-342. doi:10.1016/j.ijpsycho.2004.09.009
- 1097 Niv, Y. (2009). Reinforcement learning in the brain. *Journal of Mathematical Psychology*,  
1098 *53*(3), 139-154. doi:<https://doi.org/10.1016/j.jmp.2008.12.005>
- 1099 Otto, A. R., Raio, C. M., Chiang, A., Phelps, E. A., & Daw, N. D. (2013). Working-memory  
1100 capacity protects model-based learning from stress. *Proceedings of the National*  
1101 *Academy of Sciences*, *110*(52), 20941. doi:10.1073/pnas.1312011110
- 1102 Palminteri, S., & Pessiglione, M. (2017). Chapter 23 - Opponent Brain Systems for Reward  
1103 and Punishment Learning: Causal Evidence From Drug and Lesion Studies in  
1104 Humans. In J.-C. Dreher & L. Tremblay (Eds.), *Decision Neuroscience* (pp. 291-303).  
1105 San Diego: Academic Press.
- 1106 Peirce, J., Gray, J. R., Simpson, S., MacAskill, M., Höchenberger, R., Sogo, H., . . . Lindeløv,  
1107 J. K. (2019). PsychoPy2: Experiments in behavior made easy. *Behavior Research*  
1108 *Methods*, *51*(1), 195-203. doi:10.3758/s13428-018-01193-y
- 1109 Pessiglione, M., Vinckier, F., Bouret, S., Daunizeau, J., & Le Bouc, R. (2017). Why not try  
1110 harder? Computational approach to motivation deficits in neuro-psychiatric diseases.  
1111 *Brain*, *141*(3), 629-650.
- 1112 Petzold, A., Plessow, F., Goschke, T., & Kirschbaum, C. (2010). Stress reduces use of  
1113 negative feedback in a feedback-based learning task. *Behav Neurosci*, *124*(2), 248-  
1114 255. doi:10.1037/a0018930

- 1115 Pool, E., Brosch, T., Delplanque, S., & Sander, D. (2015). Stress increases cue-triggered  
1116 "wanting" for sweet reward in humans. *Journal of experimental psychology. Animal*  
1117 *learning and cognition*, 41 2, 128-136.
- 1118 Pruessner, J. C., Kirschbaum, C., Meinlschmid, G., & Hellhammer, D. H. (2003). Two  
1119 formulas for computation of the area under the curve represent measures of total  
1120 hormone concentration versus time-dependent change. *Psychoneuroendocrinology*,  
1121 28(7), 916-931. doi:10.1016/s0306-4530(02)00108-7
- 1122 Qin, S., Hermans, E. J., van Marle, H. J. F., Luo, J., & Fernández, G. (2009). Acute  
1123 Psychological Stress Reduces Working Memory-Related Activity in the Dorsolateral  
1124 Prefrontal Cortex. *Biological psychiatry*, 66(1), 25-32.  
1125 doi:<https://doi.org/10.1016/j.biopsych.2009.03.006>
- 1126 Raio, C. M., Hartley, C. A., Orender, T. A., Li, J., & Phelps, E. A. (2017). Stress attenuates  
1127 the flexible updating of aversive value. *Proceedings of the National Academy of*  
1128 *Sciences of the United States of America*, 114(42), 11241-11246.  
1129 doi:10.1073/pnas.1702565114
- 1130 Rescorla, R. A. (1972). A theory of Pavlovian conditioning: Variations in the effectiveness of  
1131 reinforcement and nonreinforcement. *Current research and theory*, 64-99.
- 1132 Rigoux, L., Stephan, K. E., Friston, K. J., & Daunizeau, J. (2014). Bayesian model selection  
1133 for group studies - revisited. *Neuroimage*, 84, 971-985.  
1134 doi:10.1016/j.neuroimage.2013.08.065
- 1135 Russell, G., & Lightman, S. (2019). The human stress response. *Nat Rev Endocrinol*, 15(9),  
1136 525-534. doi:10.1038/s41574-019-0228-0
- 1137 Schmidt, L., Lebreton, M., Cléry-Melin, M. L., Daunizeau, J., & Pessiglione, M. (2012).  
1138 Neural mechanisms underlying motivation of mental versus physical effort. *PLoS*  
1139 *Biol*, 10(2), e1001266. doi:10.1371/journal.pbio.1001266

- 1140 Schoofs, D., Wolf, O. T., & Smeets, T. (2009). Cold pressor stress impairs performance on  
1141 working memory tasks requiring executive functions in healthy young men. *Behav*  
1142 *Neurosci*, *123*(5), 1066-1075. doi:10.1037/a0016980
- 1143 Schubert, C., Lambertz, M., Nelesen, R. A., Bardwell, W., Choi, J. B., & Dimsdale, J. E.  
1144 (2009). Effects of stress on heart rate complexity--a comparison between short-term  
1145 and chronic stress. *Biological psychology*, *80*(3), 325-332.  
1146 doi:10.1016/j.biopsycho.2008.11.005
- 1147 Schultz, W., Dayan, P., & Montague, P. R. (1997). A neural substrate of prediction and  
1148 reward. *science*, *275*(5306), 1593-1599. doi:10.1126/science.275.5306.1593
- 1149 Schwabe, L., Dickinson, A., & Wolf, O. T. (2011). Stress, habits, and drug addiction: a  
1150 psychoneuroendocrinological perspective. *Exp Clin Psychopharmacol*, *19*(1), 53-63.  
1151 doi:10.1037/a0022212
- 1152 Schwabe, L., & Wolf, O. T. (2011). Stress-induced modulation of instrumental behavior:  
1153 from goal-directed to habitual control of action. *Behavioural brain research*, *219*(2),  
1154 321-328.
- 1155 Shafiei, N., Gray, M., Viau, V., & Floresco, S. B. (2012). Acute stress induces selective  
1156 alterations in cost/benefit decision-making. *Neuropsychopharmacology*, *37*(10), 2194-  
1157 2209. doi:10.1038/npp.2012.69
- 1158 Skvortsova, V., Degos, B., Welter, M.-L., Vidailhet, M., & Pessiglione, M. (2017). A  
1159 selective role for dopamine in learning to maximize reward but not to minimize effort:  
1160 evidence from patients with Parkinson's disease. *Journal of Neuroscience*, *37*(25),  
1161 6087-6097.
- 1162 Skvortsova, V., Palminteri, S., & Pessiglione, M. (2014). Learning to minimize efforts versus  
1163 maximizing rewards: computational principles and neural correlates. *Journal of*  
1164 *Neuroscience*, *34*(47), 15621-15630.

- 1165 Smeets, T., Cornelisse, S., Quaedflieg, C. W., Meyer, T., Jelicic, M., & Merckelbach, H.  
1166 (2012). Introducing the Maastricht Acute Stress Test (MAST): a quick and non-  
1167 invasive approach to elicit robust autonomic and glucocorticoid stress responses.  
1168 *Psychoneuroendocrinology*, 37(12), 1998-2008. doi:10.1016/j.psyneuen.2012.04.012
- 1169 Steinberg, E. E., Keiflin, R., Boivin, J. R., Witten, I. B., Deisseroth, K., & Janak, P. H.  
1170 (2013). A causal link between prediction errors, dopamine neurons and learning.  
1171 *Nature neuroscience*, 16(7), 966-973. doi:10.1038/nn.3413
- 1172 Stelly, C. E., Tritley, S. C., Rafati, Y., & Wanat, M. J. (2020). Acute Stress Enhances  
1173 Associative Learning via Dopamine Signaling in the Ventral Lateral Striatum. *The*  
1174 *Journal of Neuroscience*, 40(22), 4391. doi:10.1523/JNEUROSCI.3003-19.2020
- 1175 Team, R. C. (2020). R: A language and environment for statistical  
1176 computing. *R Foundation for Statistical Computing*. Retrieved from [https://www.R-](https://www.R-project.org/)  
1177 [project.org/](https://www.R-project.org/)
- 1178 Timmers, I., Kaas, A. L., Quaedflieg, C., Biggs, E. E., Smeets, T., & de Jong, J. R. (2018).  
1179 Fear of pain and cortisol reactivity predict the strength of stress-induced hypoalgesia.  
1180 *Eur J Pain*, 22(7), 1291-1303. doi:10.1002/ejp.1217
- 1181 Valton, V., Wise, T., & Robinson, O. J. (2020). Recommendations for Bayesian hierarchical  
1182 model specifications for case-control studies in mental health. *arXiv preprint*  
1183 *arXiv:2011.01725*.
- 1184 Varazzani, C., San-Galli, A., Gilardeau, S., & Bouret, S. (2015). Noradrenaline and  
1185 dopamine neurons in the reward/effort trade-off: a direct electrophysiological  
1186 comparison in behaving monkeys. *J Neurosci*, 35(20), 7866-7877.  
1187 doi:10.1523/jneurosci.0454-15.2015
- 1188 Watkins, C. J. C. H., & Dayan, P. (1992). Q-learning. *Machine Learning*, 8(3), 279-292.  
1189 doi:10.1007/BF00992698

- 1190 Watson, D., Clark, L. A., & Tellegen, A. (1988). Development and validation of brief  
1191 measures of positive and negative affect: the PANAS scales. *J Pers Soc Psychol*,  
1192 *54*(6), 1063-1070. doi:10.1037//0022-3514.54.6.1063
- 1193 Willenbockel, V., Sadr, J., Fiset, D., Horne, G. O., Gosselin, F., & Tanaka, J. W. (2010).  
1194 Controlling low-level image properties: The SHINE toolbox. *Behavior Research*  
1195 *Methods*, *42*(3), 671-684. doi:10.3758/BRM.42.3.671
- 1196 Wilson, R. C., & Collins, A. G. (2019). Ten simple rules for the computational modeling of  
1197 behavioral data. *Elife*, *8*, e49547.
- 1198 Wright, B. J., O'Brien, S., Hazi, A., & Kent, S. (2014). Increased systolic blood pressure  
1199 reactivity to acute stress is related with better self-reported health. *Scientific reports*,  
1200 *4*, 6882-6882. doi:10.1038/srep06882
- 1201 Yohn, S. E., Errante, E. E., Rosenbloom-Snow, A., Somerville, M., Rowland, M., Tokarski,  
1202 K., . . . Salamone, J. D. (2016). Blockade of uptake for dopamine, but not  
1203 norepinephrine or 5-HT, increases selection of high effort instrumental activity:  
1204 Implications for treatment of effort-related motivational symptoms in  
1205 psychopathology. *Neuropharmacology*, *109*, 270-280.  
1206 doi:10.1016/j.neuropharm.2016.06.018  
1207

1208 **Supplementary Figures**

1209 **Figure Supplement 1**

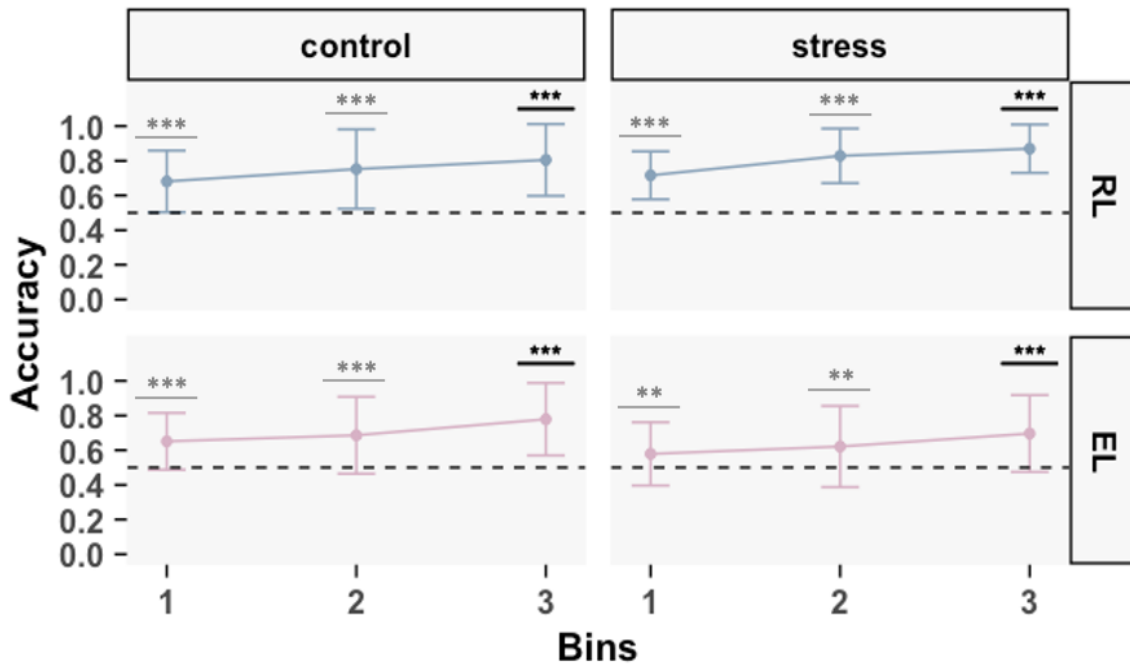

1210

1211 **Evidence of reward and action cost reinforcement learning.**

1212 Optimal stimulus choices (“accuracy”) on reward learning (RL) and effort learning (EL)

1213 (rows) trials for both conditions (columns). Trials were binned into groups of 10

1214 presentations. Participants performed significantly better than chance level in all bins. Means

1215  $\pm$  SD. Significant differences are denoted by asterisks (\*:  $p < 0.05$ , \*\*:  $p < 0.01$ , \*\*\*:  $p <$

1216 0.001).

1217 **Figure Supplement 2**

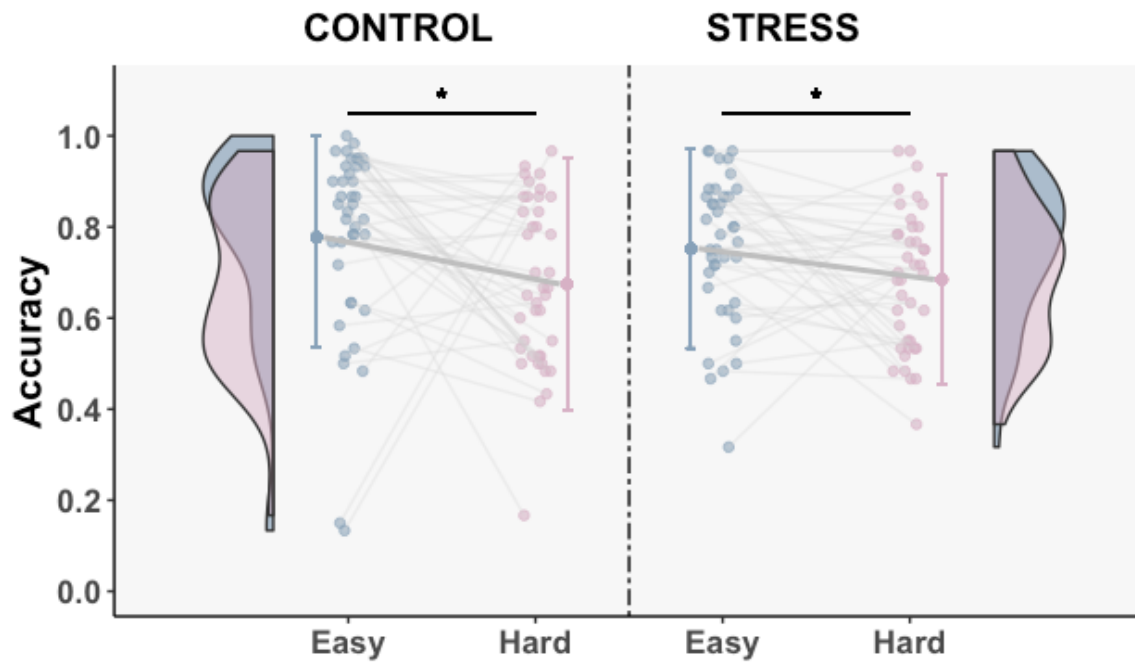

1218

1219 **Acute stress does not affect difficulty learning.**

1220 Easy and hard pairs collapsed across RL/EL trials depicted for each condition separately.

1221 While all participants sampled the optimal choices more frequently for Easy vs. Hard pairs,

1222 no significant Condition-by-Difficulty interaction or between-group differences were

1223 observed. Means  $\pm$  SD, individual data points, distribution and density of the data are

1224 displayed. Significant differences are denoted by asterisks (\*:  $p < 0.05$ , \*\*:  $p < 0.01$ , \*\*\*:  $p <$

1225 0.001).



1226 **Figure Supplement 3**

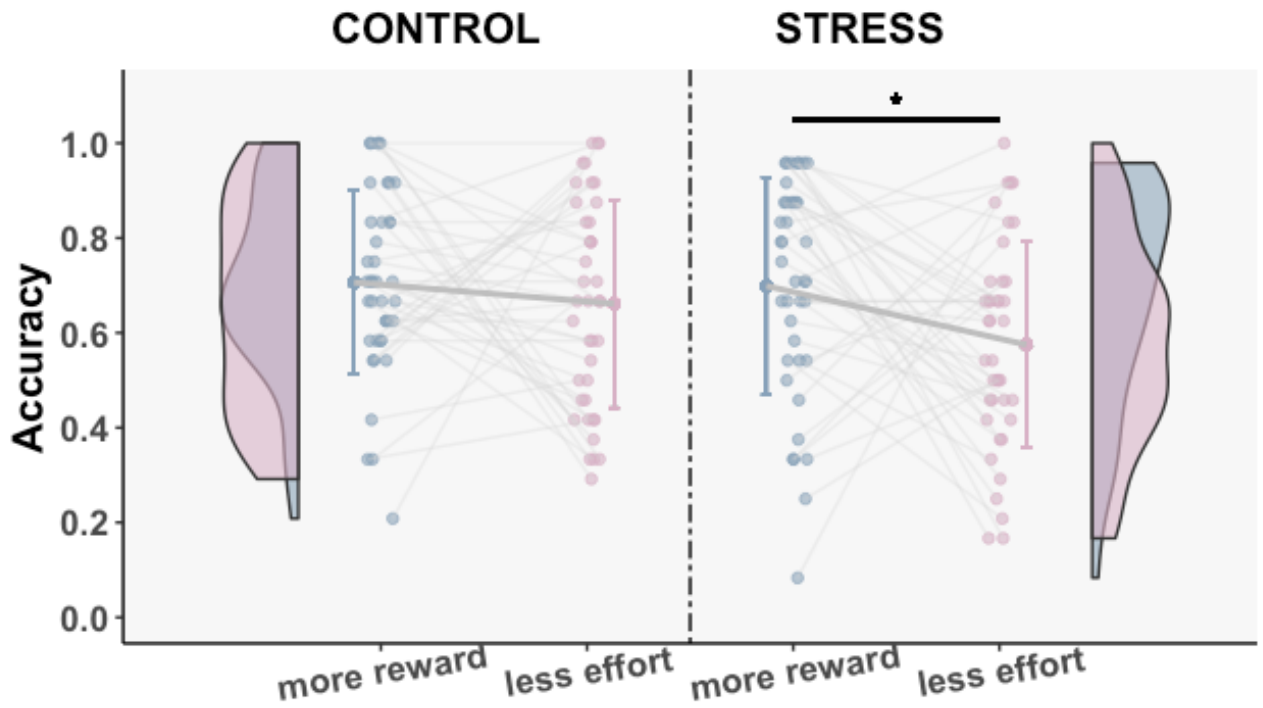

1227

1228 **Surprise test phase performance.**

1229 The acute stress group performed better on reward than action cost discrimination trials.

1230 Means  $\pm$  SD, individual data points, distribution and density of the data are displayed.

1231 Significant differences are depicted with asterisks (\*:  $p < 0.05$ , \*\*:  $p < 0.01$ , \*\*\*:  $p < 0.001$ ).

1232 **Figure Supplement 4**

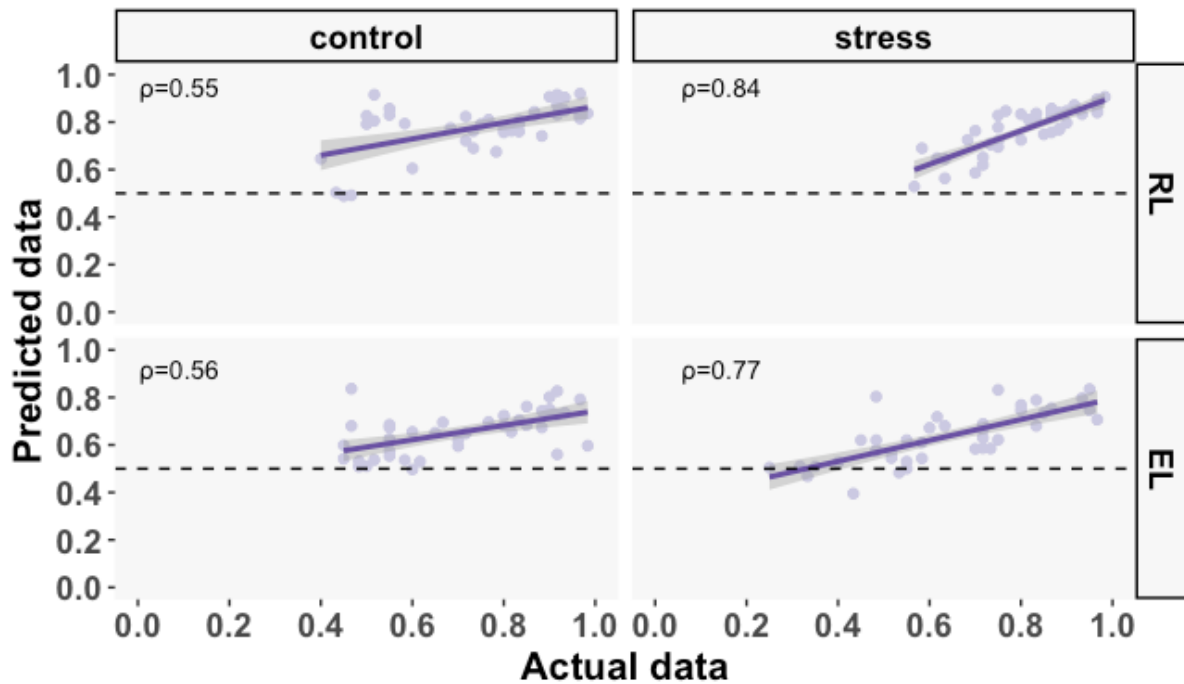

1233

1234 **Correlations between empirical and simulated 2LR<sub>γ</sub> choices.**

1235 Actual and *post hoc* simulated choices for RL and EL (rows) were highly correlated both for  
1236 no-stress control and acute stress subjects (columns). Simulations were averaged across 10  
1237 repetitions per subject. Solid and shaded lines represent mean  $\pm$  CI<sub>95%</sub>. Dots represent  
1238 individual data points. Horizontal dashed lines indicate chance level (0.5).

1239 **Figure Supplement 5**

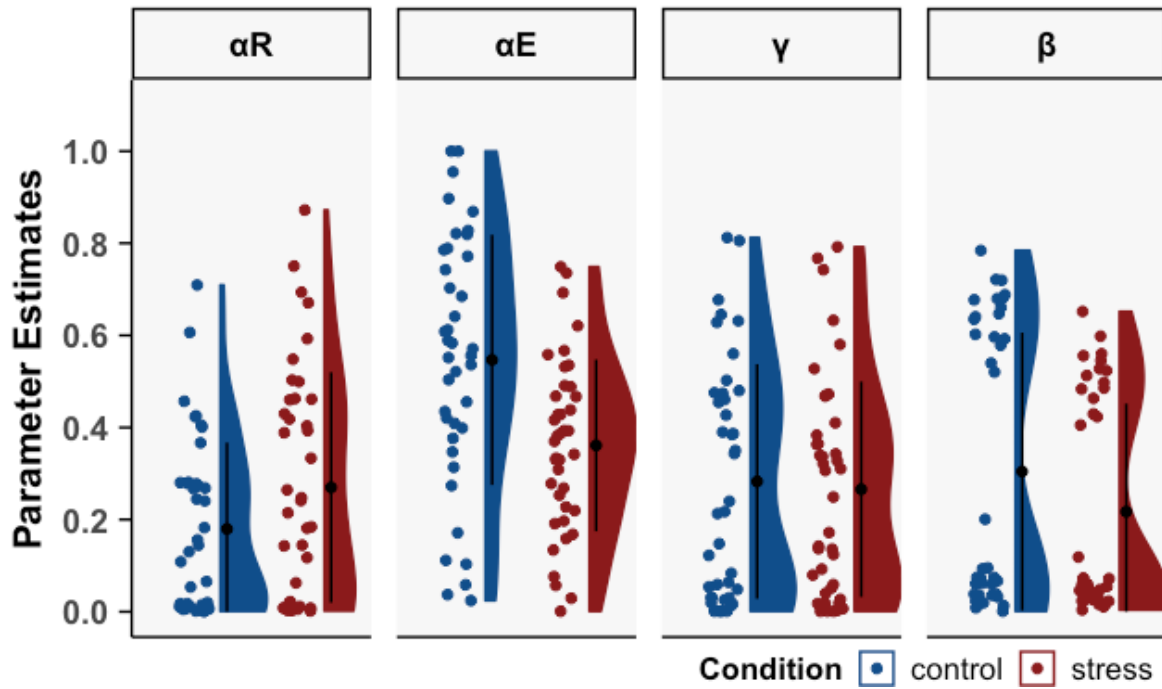

1240

1241 **Parameter estimates after Bayesian hierarchical model fitting.**

1242 Hierarchical model fitting reproduced the overall pattern of parameter estimates (Figure 5 for  
1243 comparison) .

1244 **Figure Supplement 6**

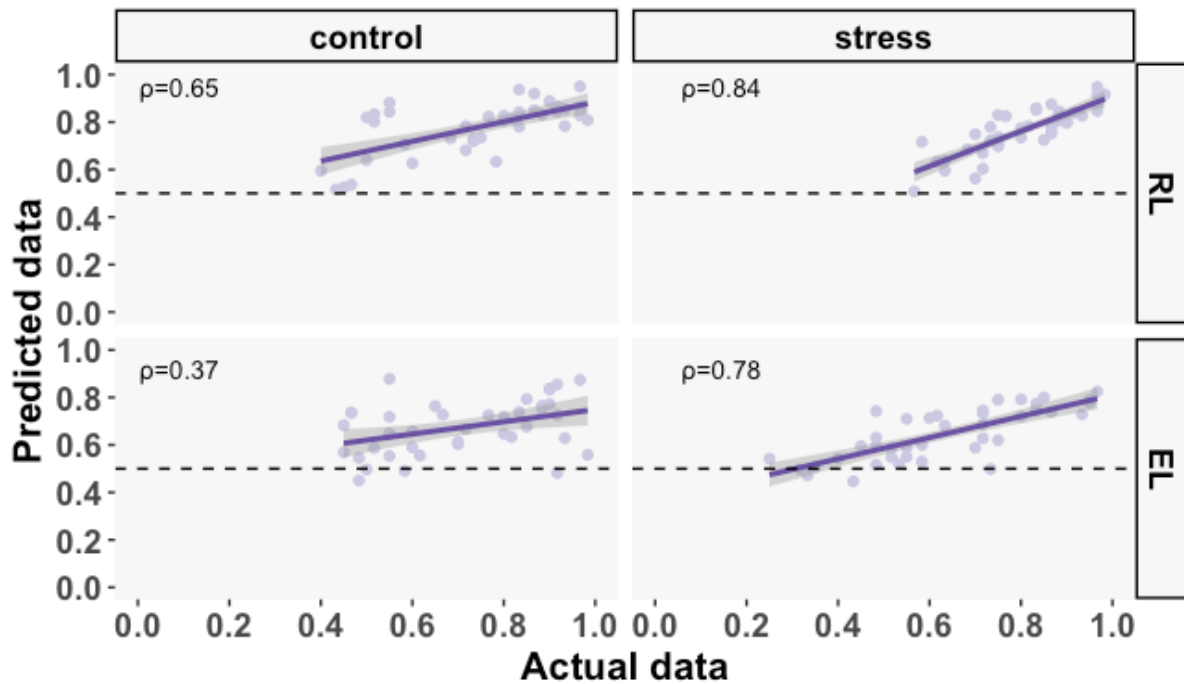

1245

1246 **Correlations between empirical and simulated 2LR<sub>γ</sub> choices after Bayesian**

1247 **hierarchical model fitting.**

1248 Correlations between actual and *post hoc* simulated choices for RL and EL (rows) for no-

1249 stress control and acute stress subjects (columns). Simulations were averaged across 10

1250 repetitions per subject. Solid and shaded lines represent mean  $\pm$  CI<sub>95%</sub>. Dots represent

1251 individual data points. Horizontal dashed lines indicate chance level (0.5).

1252 **Figure Supplement 7**

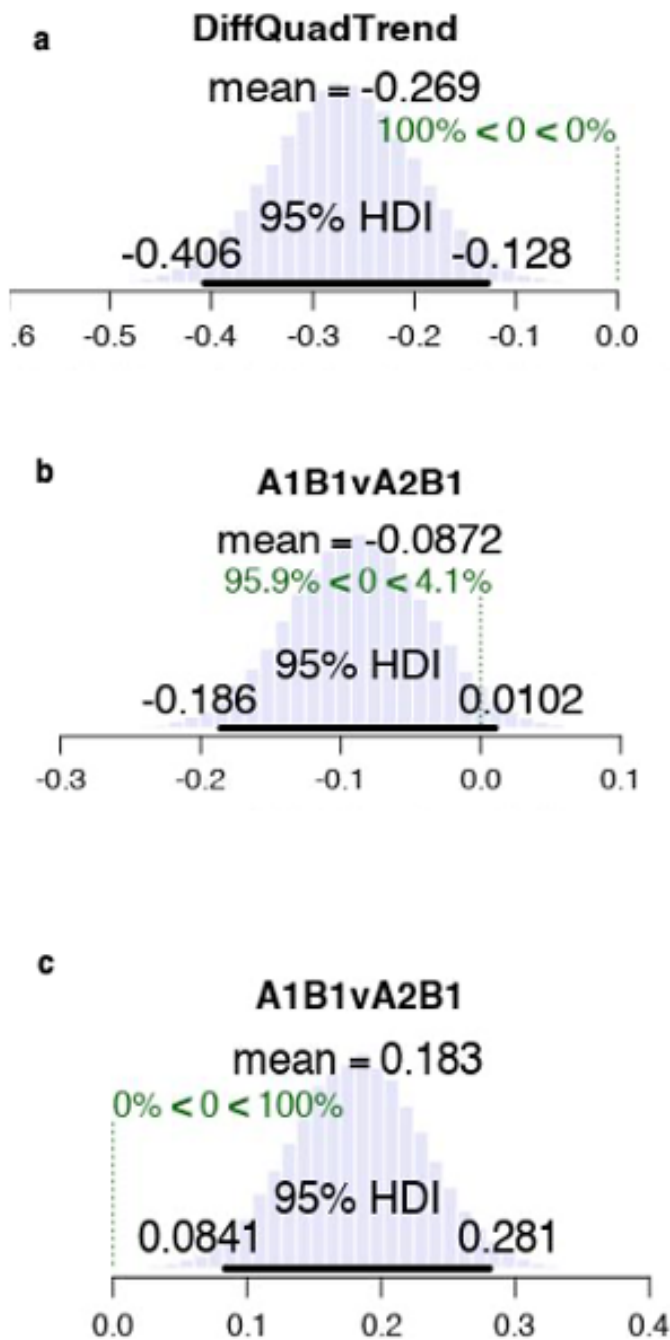

1253

1254 **Bayesian estimation analysis to evaluate group differences in posterior parameter**

1255 **distributions**

1256 Panel A. Bayesian estimation (mixed-ANOVA) using posterior parameters (following

1257 hierarchical fitting) revealed evidence for a credible Condition-by-Learning Rate interaction.

1258 The observed mean difference from zero that falls outside the 95% HDI suggests that the

1259 difference between  $\alpha_E$  and  $\alpha_R$  was greater in no-stress controls compared to acute stress  
1260 subjects. Panel B. Both groups did *not* differ in the magnitude of  $\alpha_R$ , as indicated by a 95%  
1261 HDI that included 0. Panel C. Acute stress compared to no-stress control subjects exhibited a  
1262 lower value of  $\alpha_E$ , as indicated by a 95% HDI that falls well above zero.

1263 **Figure Supplement 8**

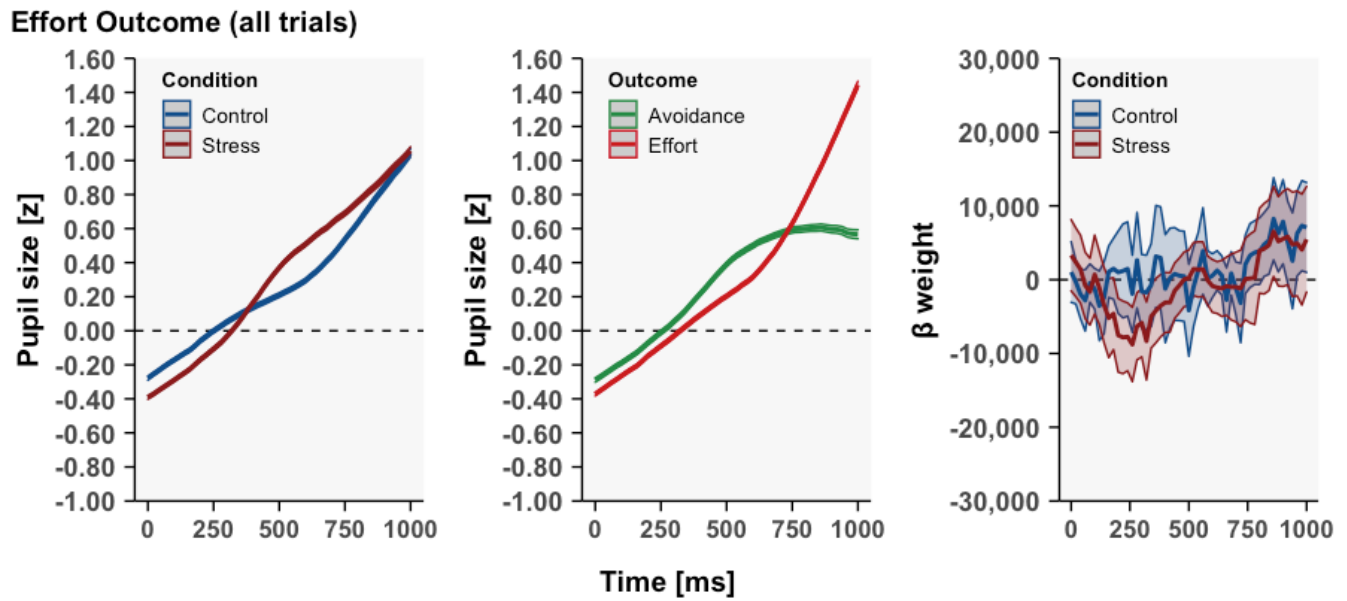

1264

1265 **Pupillometry analyses using all effort outcome trials.**

1266 **Left:** Model-free analyses of pupil size using all effort outcome trials. **Middle:** Pupil size  
1267 differences during effort/effort avoidance outcomes in the entire sample; force exertion was  
1268 associated with large effects on pupil size and these trials were therefore excluded from  
1269 analysis. **Right:** Model-based action cost prediction error analyses using all effort outcome  
1270 trials.
